# Supplementary material
Source: PubMed Central journal article supplement (PMC4763787)
Supplement: pnas.1515287113.sapp.pdf [file pnas.1515287113.sapp.pdf]

Supporting Information for

**Hybrid promiscuous (Hypr) GGDEF enzymes  
produce cyclic AMP-GMP (3', 3'-cGAMP)**

Zachary F. Hallberg, Xin C. Wang, Todd A. Wright, Beiyan Nan, Omer Ad, Jongchan  
Yeo, Ming C. Hammond

**This file includes:**

Extended Methods and Materials  
Supplementary Figures S1-S17  
Supplementary Tables S1-S4  
References

## **Extended Materials and Methods**

### **General Reagents and Oligonucleotides**

All oligonucleotides were purchased from Elim Biopharmaceuticals (Hayward, CA) or IDT (Coralville, IA). *Geobacter sulfurreducens* PCA was obtained from the laboratory of John Coates at UC Berkeley. Genomic DNA from *G. sulfurreducens* was isolated using the Purelink Genomic DNA mini kit (Invitrogen). Genomic DNA from *Myxococcus xanthus* was obtained from the laboratory of David Zusman at UC Berkeley. Additional GGDEF domain-containing synthase genes were purchased as gBlocks from IDT (Table S3). Cyclic dinucleotide standards were purchased from Axxorra (Farmingdale, NY) or enzymatically synthesized. DFHBI was chemically synthesized following literature protocols (1).

### **Molecular Cloning**

For untagged constructs used for flow cytometry screening with fluorescent biosensors, gene sequences were amplified from genomic DNA and inserted into the MCS2 region of pCOLADuet-1. For C-terminal 6x-His-tagged constructs, gene sequences were inserted between NdeI and XhoI restriction sites of pET24a or pET31b. For N-terminal 6xHis-MBP-tagged constructs, gene sequences were inserted between BamHI and XhoI restriction sites of a custom pET16-derived vector from reference (2). pET28a containing *E. coli* BL21 (DE3)-derived *yhdH* between the NdeI and EcoRI cut sites was provided by the M. Chang lab at the University of California at Berkeley.

### **Significance Analysis for Fluorescence Biosensor Screen**

Fluorescence turn-on was analyzed by the Student's t-test using 1 tail and 2 sample equal variance parameters,  $p < 0.01$  was the cut-off for significant turn-on. For the cdiG biosensor, the significance test was between candidate GGDEF signal and pCOLA signal. The cAG biosensor is ~100-fold selective for cAG over cdiG, but some fluorescence above background is still observed for cdiG synthases. Thus, for the cAG biosensor, the significance test was between candidate GGDEF signal and WspR signal.

### **Liquid Culture Growth of *E. coli* BL21 (DE3) Star for Nucleotide Extraction**

Overnight starter cultures of BL21 (DE3) Star cells containing the pRARE2 plasmid (Invitrogen) and genes encoding dinucleotide cyclase enzymes in pET24a (or pET31b for GSU1656; pET-MBP for ACP\_2467, Calni\_1629, and DEFDS\_0689) were inoculated into LB media and grown aerobically to an OD<sub>600</sub> ~ 0.3. Cultures were then induced with 1 mM IPTG at 28 °C for 4 h. Cells were harvested by centrifugation at 4,700 rpm for 15 min at 4 °C, and pellets were stored at -80 °C.

### **Cell Extraction of *E. coli***

Cyclic dinucleotides were extracted as described previously (3), with the following modifications. A frozen cell pellet from 100 mL of liquid culture was thawed and resuspended in 1.4 mL extraction buffer (40% methanol, 40% acetonitrile, 20% ddH<sub>2</sub>O). The cell solution was incubated at ambient temperature with agitation for 20 min. After centrifugation for 5 min at 13,200 rpm, the supernatant was carefully removed and stored on ice. The remaining pellet was extracted twice more as described, with 700 µL extraction solvent each time. The combined supernatants were evaporated to dryness by rotary evaporation, and the dried material was resuspended in 300 µL ddH<sub>2</sub>O. The extract was filtered through a 3 kDa MWCO Amicon Ultra-4 Protein Concentrator (Millipore) and used immediately or stored at -20 °C.

### **LC-MS Analysis of *E. coli* Cell Extracts**

LC-MS analysis of *E. coli* cell extracts was performed using an Agilent 1260 Quadrupole LC-MS with an Agilent 1260 Infinity liquid chromatograph equipped with a diode array detector. Sample volumes of 20 µL were separated on a Poroshell 120 EC C18 column (50 mm length x 4.6 mm internal diameter, 2.7 µm particle size, Agilent) at a flow rate of 0.4 mL/min. For analysis of cell extracts and purified protein, a linear elution program of 0 to 10% B over 20 min. Solvent A was H<sub>2</sub>O + 0.05 % TFA and solvent B was MeCN + 0.05 % TFA. Under the former conditions, the cyclic dinucleotides in extracts were found to always elute in the order of cdiG (7.3±0.3 min), cAG (7.6±0.3), and cdiA (7.9±0.4 min). Due to slight variability in retention times, the assignment of cyclic dinucleotide identity was made through analysis of the mass spectra. Shown in figures

are the MS spectra from integrating the retention time region containing all three cyclic dinucleotides (6 to 8 min).

Extract samples were analyzed by MS in the positive ion mode using the range of  $m/z = 600$  to  $800$ . When a broader range of  $100$  to  $1000$   $m/z$  was used, the expected mass for the corresponding cyclic dinucleotide was present, but was not the most abundant ion peak observed, even with the standards. This observation suggests that the relative ionization of cyclic dinucleotides is low under these conditions, and furthermore the cyclic dinucleotides may not be fully resolved from other small molecules present in the extract. Thus the UV absorbance peaks detected at  $254$  nm may not be solely attributable to cyclic dinucleotides.

For high-resolution and tandem MS/MS, lysate was first fractionated on a Agilent 1260 Infinity liquid chromatograph equipped with a diode array detector and analytical-scale fraction collector as previously described (4). High-resolution mass spectrometry (HRMS) and tandem mass spectrometry (MS/MS) measurements of collected fractions were performed as previously described (4) using an Agilent 1200 liquid chromatograph (LC) that was connected in-line with an LTQ-Orbitrap-XL hybrid mass spectrometer equipped with an electrospray ionization (ESI) source (Thermo Fisher Scientific). This instrumentation is located in the QB3/Chemistry Mass Spectrometry Facility at UC Berkeley.

### **Overexpression and Purification of Dinucleotide Cyclase Enzymes**

Full-length proteins with N-terminal His-6-MBP tags encoded in a pET16-derived plasmid were overexpressed in *E. coli* BL21 (DE3) star cells harboring a pRARE2 human tRNA plasmid and were grown in LB/carb/chlor for 10 h after induction at  $OD_{600} \sim 0.7$  with  $1$  mM IPTG. Cells were lysed by sonication in a lysis buffer containing  $25$  mM Tris-HCl (pH 8.2),  $500$  mM NaCl,  $20$  mM imidazole, and  $5$  mM beta-mercaptoethanol. Clarified lysate was bound to Ni-NTA agarose (QIAGEN), and resin was washed with lysis buffer prior to elution with lysis buffer supplemented with  $500$  mM imidazole. Proteins were dialyzed overnight at  $4$  °C against buffer containing  $25$  mM Tris-HCl (pH 7.5),  $100$  mM NaCl,  $5\%$  (v/v) glycerol, and  $1$  mM DTT. Protein purified in this way was

concentrated to ~5-10 mg/mL, flash frozen in liquid nitrogen, and stored at -80 °C. Protein with C-terminal His-6x tags encoded in pET24a were overexpressed and purified similarly, with the cells grown in LB/kan/chlor.

### **Pulldown Assays to Detect Protein Self-Association**

After inoculating fresh LB cultures from overnight starter cultures of *E. coli* BL21 (DE3) Star cells containing the pRARE2 plasmid (Invitrogen), C-terminal His-tagged enzymes in pET24a or pET28a, and C-terminal HA-tagged enzymes in pET22b, cells were grown aerobically to an OD<sub>600</sub> ~ 0.3, then induced with 1 mM IPTG at 28 °C for 4 h. Cells were harvested by centrifugation at 4,700 rpm for 15 min at 4 °C, and pellets were stored at -80 °C. The cells were resuspended in lysis buffer (25 mM Tris-HCl (pH 8.2), 500 mM NaCl, 20 mM imidazole, and 5 mM beta-mercaptoethanol), and lysed using a Biospec MiniBeadBeater-16. Lysates were cleared by centrifugation at 4 °C at 13,000 rpm for 45 min. Clarified lysates were suspended in Ni-NTA resin (QIAGEN). The resin was washed five times with lysis buffer. The proteins were eluted with lysis buffer supplemented with 500 mM imidazole. The epitope-tagged HA protein was detected with HRP-conjugated BMG-3F10 anti-HA rat antibody (Roche, 1:1000). Validation information for the antibody is available on the manufacturer website.

### **Isothermal Titration Calorimetry**

Samples of MBP-tagged GSU1658 R393A were first dialyzed into buffer containing 50 mM Tris-HCl [pH 7.5], 100 mM NaCl, and 1 mM TCEP, and then concentrated using a 5 mL Amicon Ultra MWCO 10 kDa concentrator (Millipore). Protein samples and buffer were then loaded onto a Microcal Auto-iTC200 isothermal titration calorimeter (Malvern, Worcestershire, UK). Details of the dissociation experiment and subsequent analysis have been described previously (5, 6). Briefly, 3.1 µL samples of MBP-GSU1658 R393A (at concentrations of 111 µM and 119 µM) were injected into the cell filled with buffer (400 µL volume) at 4 min intervals. The measurement was obtained at 28 °C. Both measurements of each state were analyzed with Origen software (OrigenLab) to obtain  $\Delta H$  and  $K_D$  values for the dissociation reaction. An additional fit parameter was also used upon data evaluation to eliminate constant background heat produced by technical

effects and dilution of titrant. However, in all cases, best fit curves corresponded to enthalpic changes in excess of 100 kcal/mol, likely a result of aggregate dissociation instead of dimer dissociation.

### **Size Exclusion Chromatography**

GSU1658 was monitored by size-exclusion chromatography (SEC) by using a Superdex 200 HiLoad 26/60 column (GE Healthcare). Dialysis buffer (100 mM Tris-HCl, pH 7.5, 100 mM NaCl, 1 mM DTT, 5% glycerol) was used as running buffer for the protein samples. Runs were performed on an ÄKTApurifier (GE Healthcare) FPLC system at a flow rate of 0.5 ml/min.

### ***In Vitro* Activity Assay of Dinucleotide Cyclases using Radiolabeled NTPs**

*In vitro* activity assays were performed as previously described by Kranzusch et al., with the following modifications (2). Enzyme (10  $\mu$ M) was incubated in a solution of 50 mM Tris-HCl [pH 7.5], 100 mM NaCl, 10 mM MgCl<sub>2</sub>, and 5 mM dithiothreitol with the indicated amounts of ATP and GTP and ~0.1  $\mu$ Ci radiolabeled [ $\alpha$ -<sup>32</sup>P]-ATP or [ $\alpha$ -<sup>32</sup>P]-GTP (Perkin Elmer) as indicated. Reactions were incubated at 28 °C for 1 h. The total concentration of radiolabeled nucleotide did not exceed 66 nM, and so we expect that this does not significantly affect the results of any ratio-based experiments performed. Following incubation, the reaction was treated with 20 units of Calf Intestinal Alkaline Phosphatase (NEB) at 28 °C for 30 min to digest the unincorporated NTPs. Reactions were terminated by heating to 95 °C for 30 s. The reaction mixture (1  $\mu$ L) was then spotted onto a PEI-cellulose F Thin-Layer Chromatography plate (Millipore), and allowed to dry for 15 min at room temperature. TLC plates were developed using 1 M KH<sub>2</sub>PO<sub>4</sub>, pH 3.6. Plates were dried overnight post-development, and radiolabeled products were detected using a Phosphor-image screen (GE Healthcare) and a Typhoon scanner (GE Healthcare).

### ***In Vitro* Activity Assay of Dinucleotide Cyclases using LC-MS**

*In vitro* activity assays were performed as described above, with omission of both radiolabeled nucleotides and digestion with Calf Intestinal Alkaline Phosphatase. After termination of the reactions by heating to 95 °C for 30 s, reactions were filtered using a

0.45  $\mu$ m filter, and analyzed by LC-MS. For LC-MS analysis, an elution program of 0% B for 5 minutes, followed by a linear gradient from 0 to 5% B over 10 min, was used. Solvent A was H<sub>2</sub>O + 0.05 % TFA and solvent B was MeCN + 0.05 % TFA. Under these conditions, the cyclic dinucleotides in extracts were found to always elute in the order of cdiG (8.7  $\pm$  0.3 min), cAG (10.6  $\pm$  0.3 min), and cdiA (11.0  $\pm$  0.5 min). Due to slight variability in retention times, the assignment of cyclic dinucleotide identity was made through analysis of the mass spectra. Shown in figures are the MS spectra from integrating the retention time region containing all three cyclic dinucleotides (8 to 12 min).

### **Bioinformatic Analysis of GGDEF Variants**

A Python-based program was developed to extract alignment data for a library of 42,747 putative GGDEF domain-containing proteins from the Pfam database (accession PF00990, <http://pfam.xfam.org/>, accessed 06/05/2014). In particular, positions critical for catalytic activity (i.e. the GG[D/E]EF sequence) and selectivity (i.e. positions 344 and 326 in PleD) were identified and analyzed for each sequence. Given previous results with some DGCs possessing altered signature motifs, we assigned any diguanylate cyclase with a [G/A/S]G[D/E][F/Y] motif to be active.

### **Growth of *Myxococcus xanthus***

Wild type (DZ2) *M. xanthus* was cultured at 32 °C in liquid CYE medium (7) to an OD<sub>600</sub> ~0.6. For liquid grown cultures, cells were pelleted and frozen at -80 °C until use. For cultures grown on agar, liquid culture (25 mL at OD<sub>600</sub> ~0.6) was poured onto a CYE plate (150 mm diameter, 1.5% (w/v) agar), and incubated for 24 h at 32 °C to allow the cells to settle onto the agar surface. Excess liquid culture was then discarded. The cells attached to the agar surface were incubated at 32 °C for another 24 h before being harvested using a cell scraper.

### **LC-MS Analysis of *Myxococcus xanthus* Cell Extracts**

LC-MS analysis of *M. xanthus* cell extracts was performed using an Agilent 6530 Accurate-Mass Q-TOF LC-MS with an Agilent 1290 Infinity UHPLC. This instrumentation is located in the laboratory of Professor Michelle Chang at UC Berkeley.

Samples were separated on a Poroshell 120 SB-Aq column (50 mm length x 2.1 mm internal diameter, 2.7  $\mu$ m particle size, Agilent) at a flow rate of 0.6 mL/min. For analysis of cell extracts, a linear elution program of 0 to 20% B over 4 min with an initial hold at 0% B for the first 0.2 min was used. Solvent A was H<sub>2</sub>O + 0.1% formic acid and solvent B was MeCN. MS data were collected from 0.9 to 2.4 min.

Extract samples were analyzed by MS in the positive ion mode using the range of m/z = 50 to 1100 or 1700. MS/MS measurements were performed with a fragmentation voltage of 150 V and a collision energy of 20 V.



## GGDEF Enzymes in *Geobacter sulfurreducens*

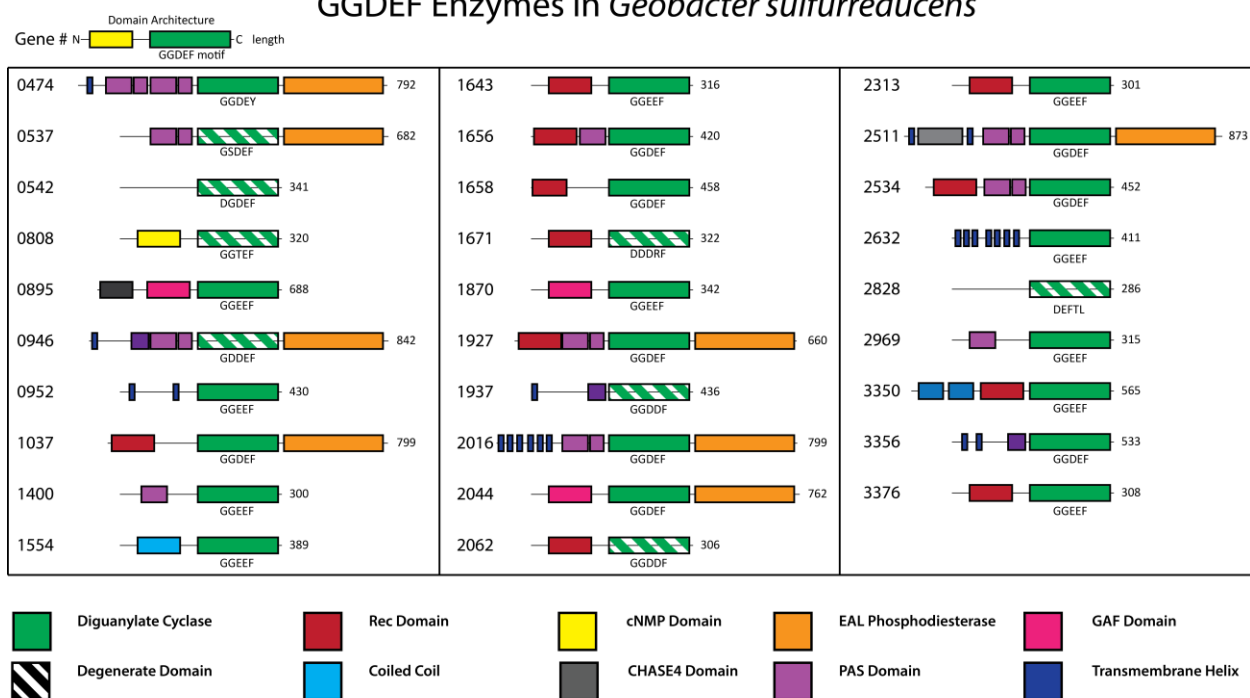

**Figure S1 – Domain architecture of GGDEF-domain containing proteins in *Geobacter sulfurreducens* PCA.** Proteins tested for cdiG- and cAG-synthase activity are shown. REC, response receiver regulator domain found in two-component regulatory systems; cNMP, cyclic nucleotide monophosphate binding domain; EAL, cdiG-specific phosphodiesterase domain; GAF, domain present in cGMP phosphodiesterases, adenylyl cyclases, and FhIA, sometimes associated with phytochromes; CHASE4, cyclase/histidine kinase associated extracellular sensor domain; PAS, PER/ARNT/SIM domain involved in oxygen, light, and redox state sensing. The residues corresponding to the “signature” “GGDEF” motif are shown below the GGDEF domain for each.

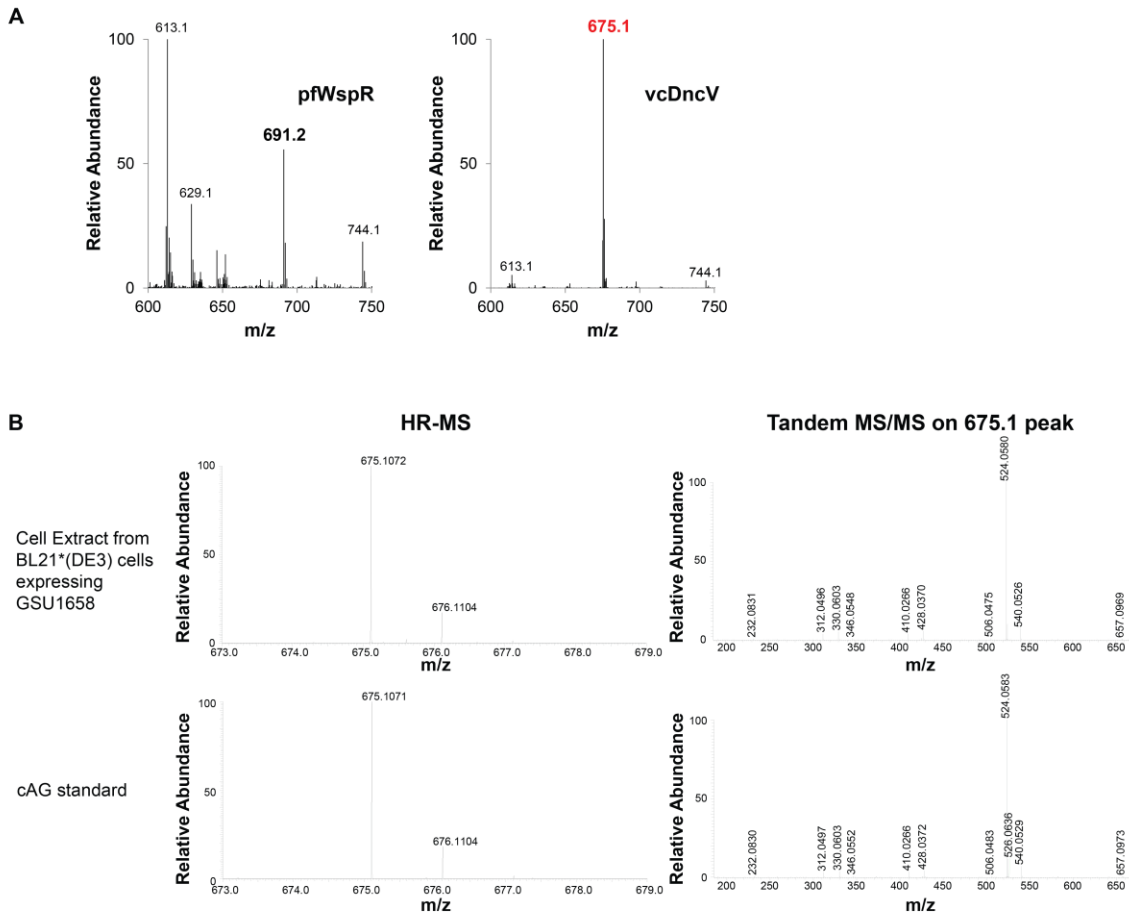

**Figure S2 – Cell extraction of enzyme standards and GSU1658. (A)** HPLC-MS of lysates from BL21 star (DE3) cells expressing control enzymes. Left: WspR, a cdiG ( $m/z = 691.1$ ) synthase; right: DncV, a cAG ( $m/z = 675.2$ ) synthase. **(B)** Mass spectrometry analysis of lysate from BL21 star (DE3) cells expressing GSU1658 or synthetic 3',3'-cAG standard. Left: High-resolution mass-spectrometry; Right: Tandem MS/MS of the 675.1 peak observed.

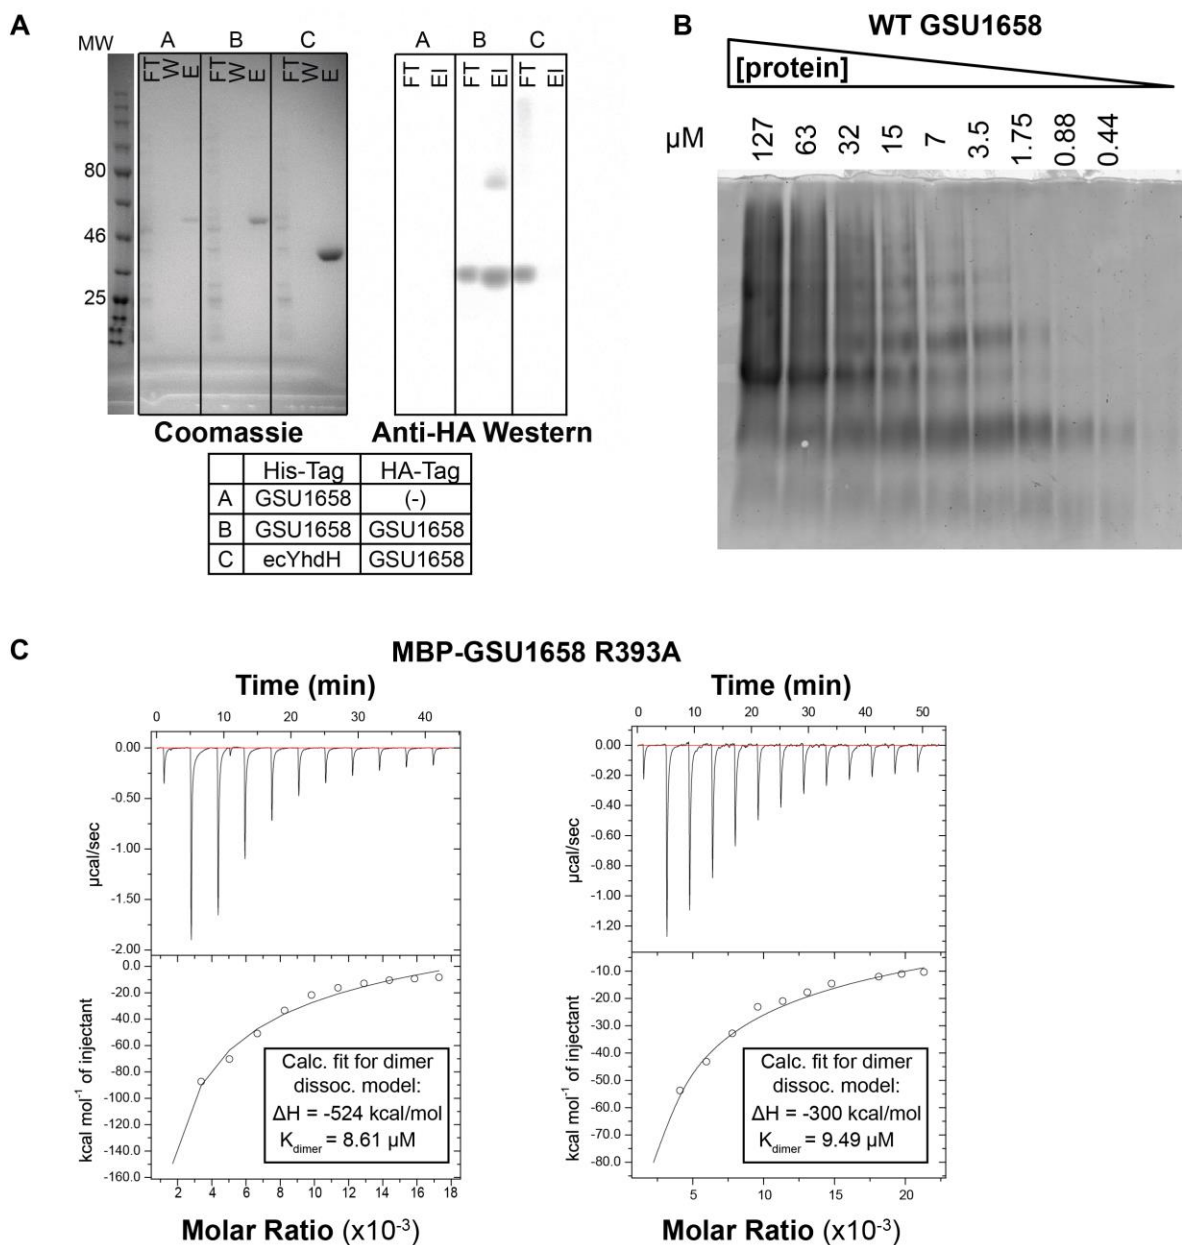

**Figure S3 – Analysis of GSU1658 dimerization.** (A) Pull-down of differentially tagged GSU1658 constructs. His-tagged WT GSU1658 or BL21-derived YhdH was co-expressed with a plasmid control containing no enzyme or HA-tagged WT GSU1658, and the cell lysate purified by Ni-NTA affinity chromatography. Samples were then immunoblotted against the HA epitope. (B) Native PAGE analysis of GSU1658-6xHis conformers. Samples were visualized with SYPRO<sup>®</sup>-Orange (Life Technologies) staining. (C) Dilution ITC of MBP-GSU1658 R393A mutants. GSU1658 at 111 and 119  $\mu\text{M}$  were diluted into buffer and the heat change measured over multiple rounds of injection. Enthalpy change and  $K_{\text{dimer}}$  values were obtained by fitting heat changes to a dimer dissociation model; the high enthalpy values suggest this model is incorrect.

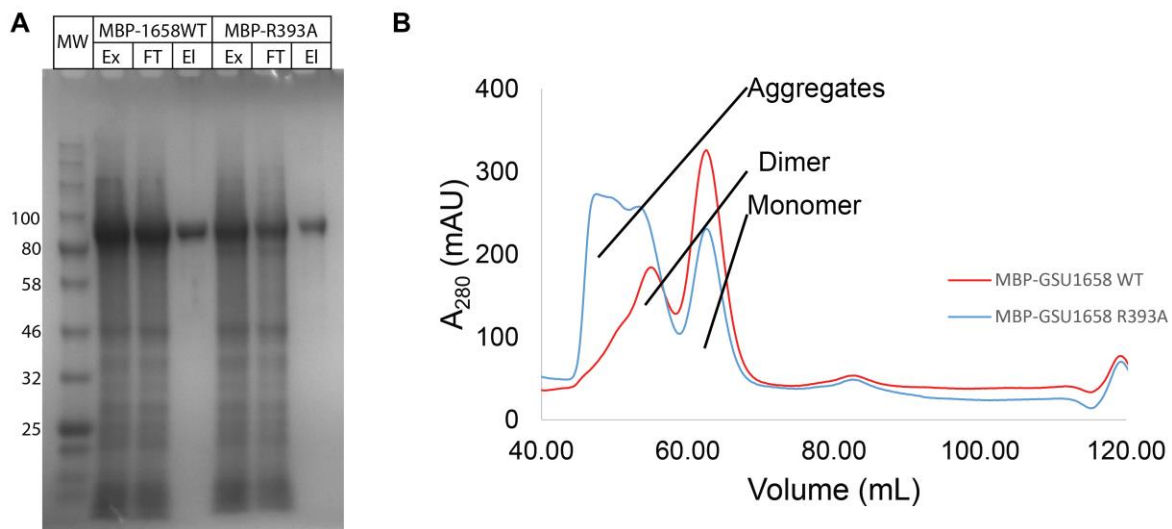

**Figure S4 – Purification of MBP-tagged GSU1658.** (A) SDS-PAGE gel analysis of fractions from the purification of MBP-tagged WT- and R393A-GSU1658. Gels were stained with GelCode Blue (Thermo Scientific). Ex, extract; FT, flow-through; El, elution. (B) Size-exclusion chromatography of MBP-tagged variants of GSU1658. MBP-GSU1658 (WT or R393A, 50  $\mu$ M, 1 mL) was analyzed by SEC. Shown is the  $A_{280}$  trace starting at the void volume of  $\sim$ 40 mL.

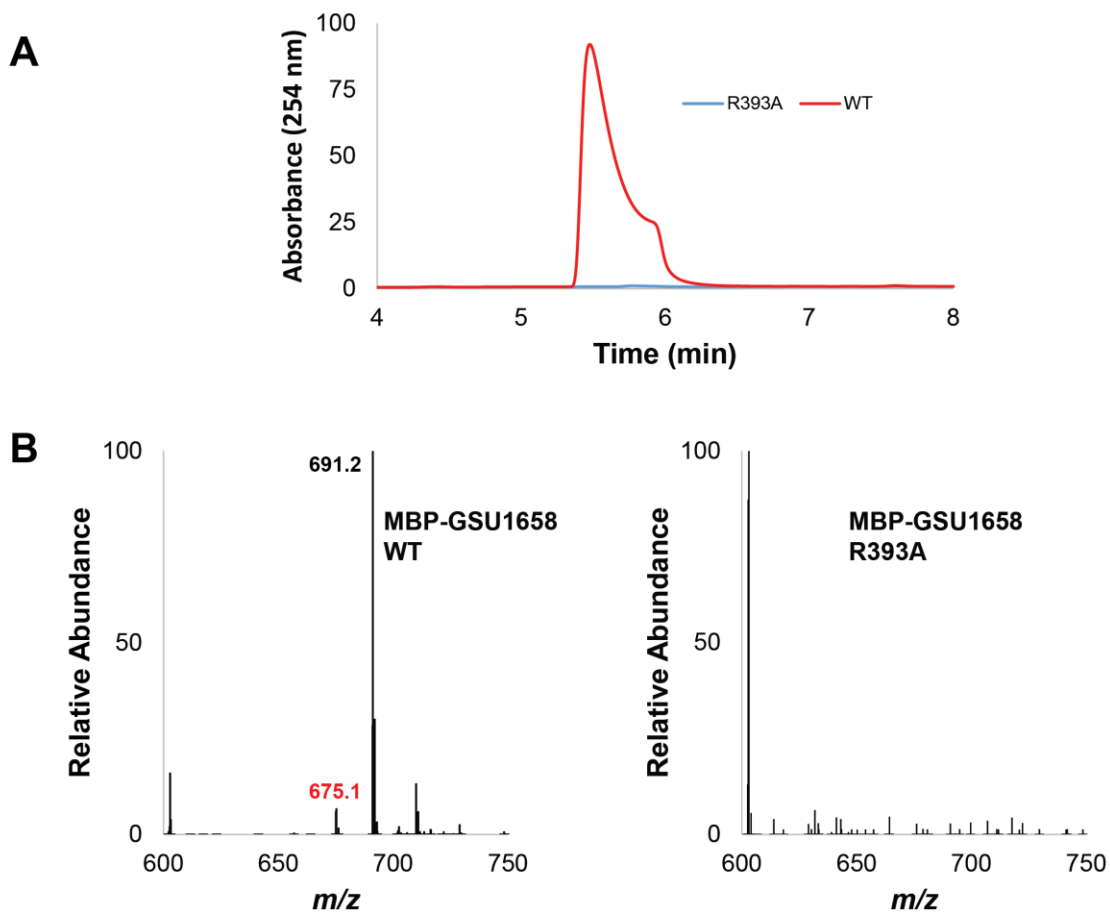

**Figure S5 – R393A mutation of GSU1658 ablates CDN binding to I-site.** (A) Overlay of UV-Vis spectra and (B) MS spectra from HPLC-MS analysis of nucleotides bound to MBP-tagged GSU1658 constructs. The MS spectra are from integrating the retention time region containing all three cyclic dinucleotides (6 to 8 min). Expected masses are for cdiG ( $m/z = 691$ ) and cAG ( $m/z = 675$ ).

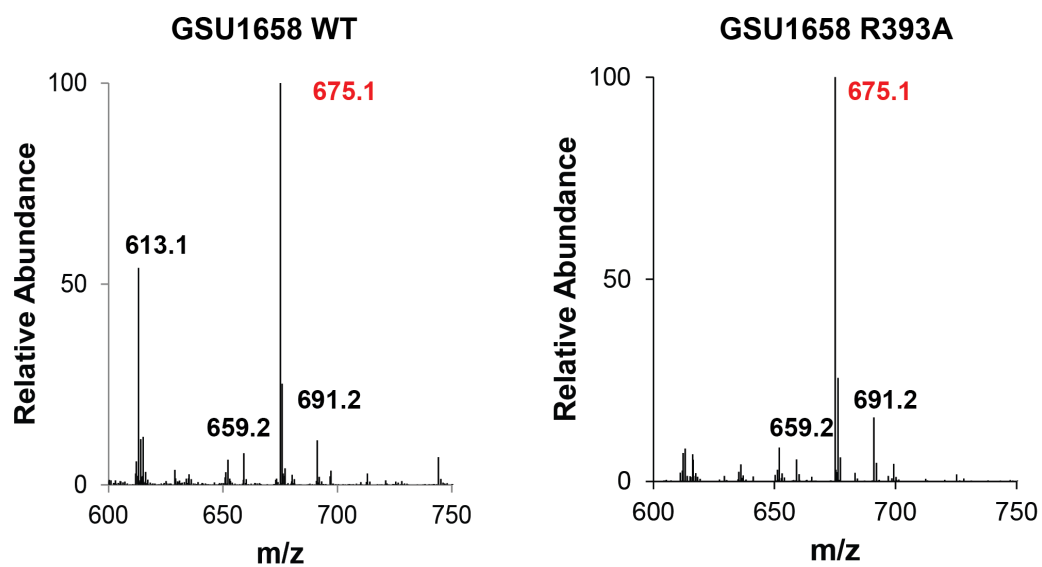

**Figure S6 – HPLC-MS analysis of lysate from cells expressing the GSU1658 wild-type and R393A mutant.** The MS spectra shown integrates the retention time region containing all three cyclic dinucleotides (6 to 8 min). Expected masses are for cdiG (m/z = 691), cAG (m/z = 675), and cdiA (m/z = 659).

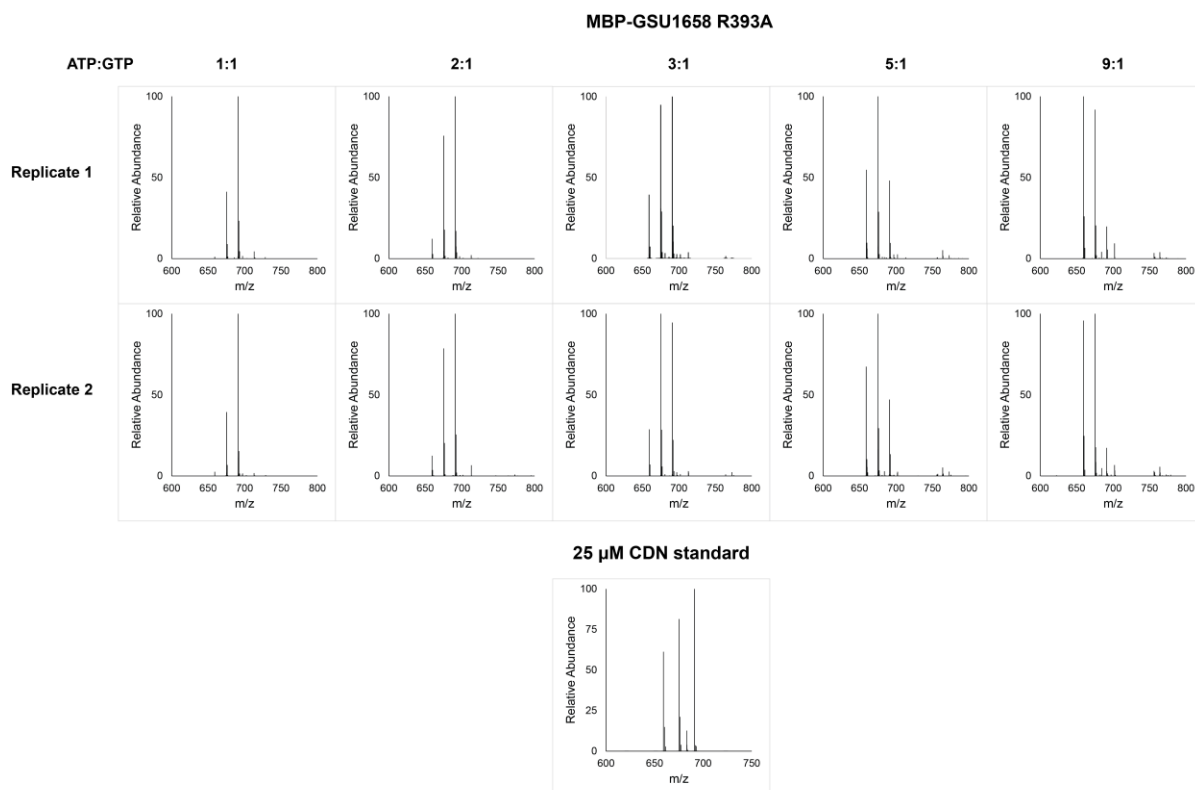

**Figure S7 – LC-MS analysis of CDN product distribution for MBP-tagged GSU1658 R393A mutant.** LC-MS analysis of *in vitro* enzyme reactions with varying ratios of ATP to GTP. Shown is the MS spectra from integrating the retention time region containing all three cyclic dinucleotides (6 to 8 min). Expected masses are for cdiG ( $m/z = 691$ ), cAG ( $m/z = 675$ ), and cdiA ( $m/z = 659$ ).

MBP-GSU1658 D52E/R393A

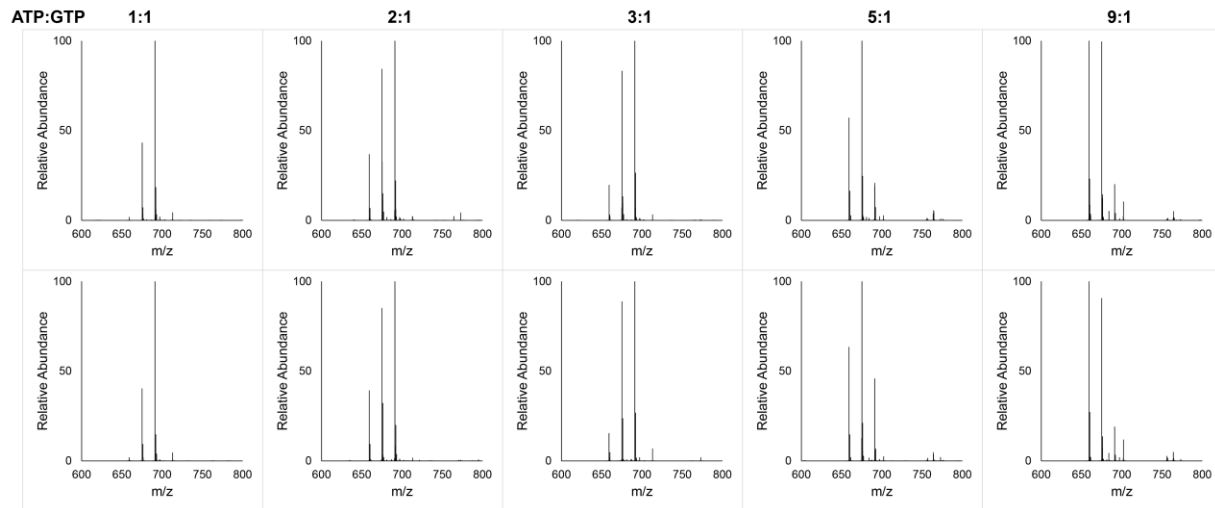

**Figure S8 – LC-MS analysis of CDN product distribution for MBP-tagged GSU1658 D52E/R393A mutant.** LC-MS analysis of *in vitro* enzyme reactions with varying ratios of ATP to GTP. Shown is the MS spectra from integrating the retention time region containing all three cyclic dinucleotides (6 to 8 min). Expected masses are for cdiG ( $m/z = 691$ ), cAG ( $m/z = 675$ ), and cdiA ( $m/z = 659$ ).



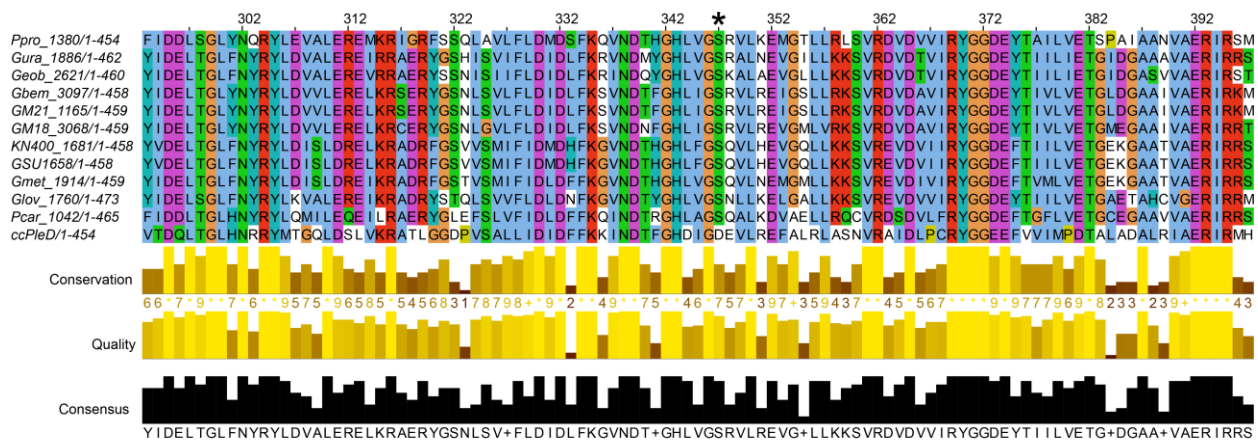

## Enzyme

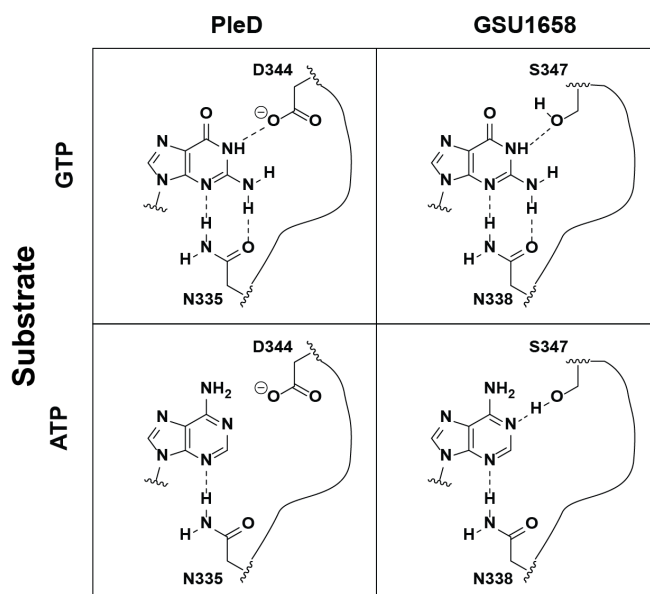

**Figure S9. Alignment of representative *Geobacter* GGDEF domains and proposed model for nucleotide recognition. (A)** Sequence alignment of the GGDEF domain of PleD, a canonical diguanylate cyclase, with all HyprA GGDEF domains in sequenced *Geobacter* and *Pelobacter* species. The encoding gene is conserved and found in the same genomic location, 5' to the histidyl tRNA synthetase gene *hisS*. The position of the substrate-binding aspartate, D344 in PleD, and its S347 counterpart in GSU1658 is marked with an asterisk. Ppro, *Pelobacter propionicus*; Gura, *Geobacter uraniireducens*; Geob, *Geobacter daltonii* FRC-32; GM21, *Geobacter* sp. (Strain M21); GM18, *Geobacter* sp. M18; KN400, *Geobacter sulfurreducens* KN400; GSU, *Geobacter sulfurreducens* PCA; Gmet, *Geobacter metalireducens*; Glov, *Geobacter lovleyi*; Pcar, *Pelobacter carbinolicus*. Alignments were performed using the MUSCLE alignment program with the standard settings in JalView (8). **(B)** Proposed model for purine nucleotide recognition by PleD versus GSU1658.

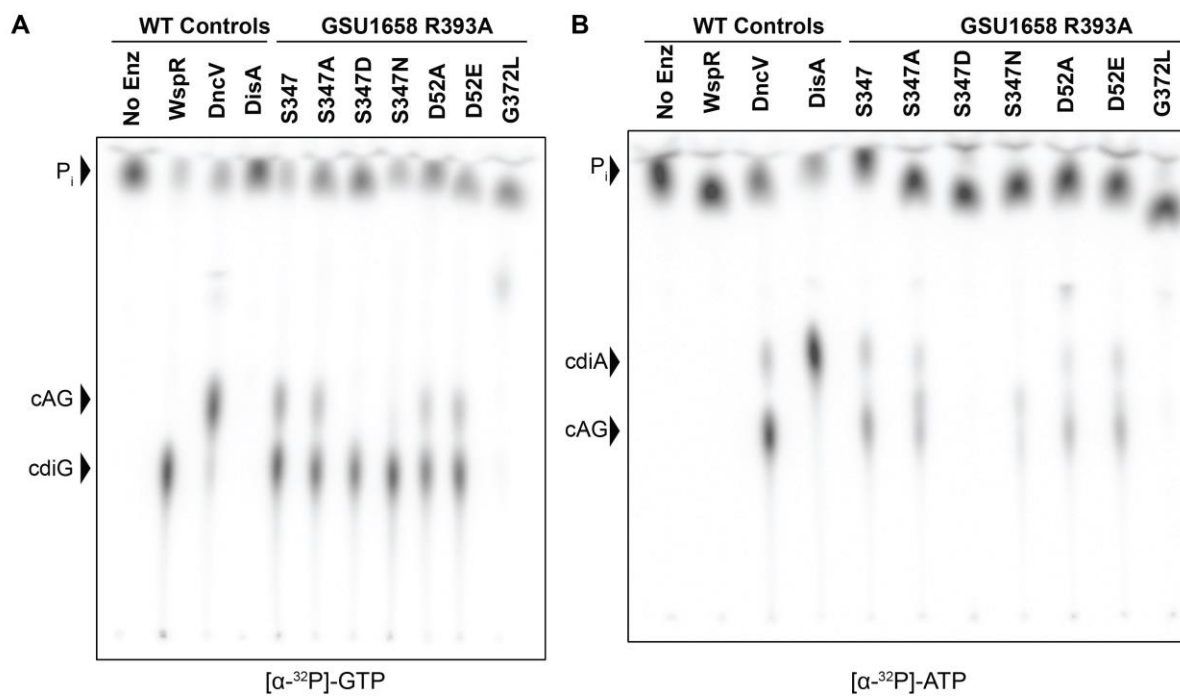

**Figure S10. Activity assay of GSU1658 mutants with radiolabeled NTPs.** Cellulose thin layer chromatography of radiolabeled products from enzymatic reactions with 1:1 ATP to GTP substrates in excess and doped with trace amounts of  $\alpha\text{-}^{32}\text{P}$ -labeled (**A**) GTP or (**B**) ATP. (**A**) is the full TLC plate for the inset shown in Figure 3. The positions of the cyclic dinucleotide products (cAG, cdiG, cdiA) and inorganic phosphate ( $\text{P}_i$ ) are marked.

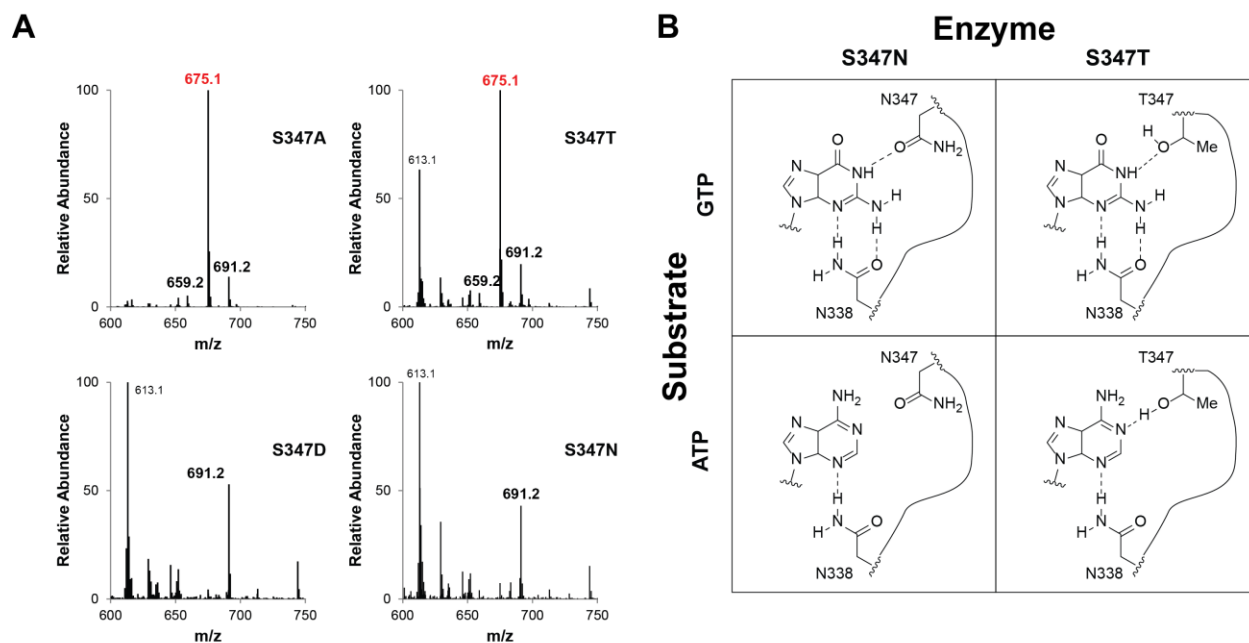

**Figure S11. Analysis of specificity residue mutations in GSU1658. (A)** LC-MS analysis of extracts from cells expressing GSU1658 single mutants in pET24a with C-terminal 6x-His tags. **(B)** Proposed model for purine nucleotide binding by S347N and S347T GSU1658 mutants.

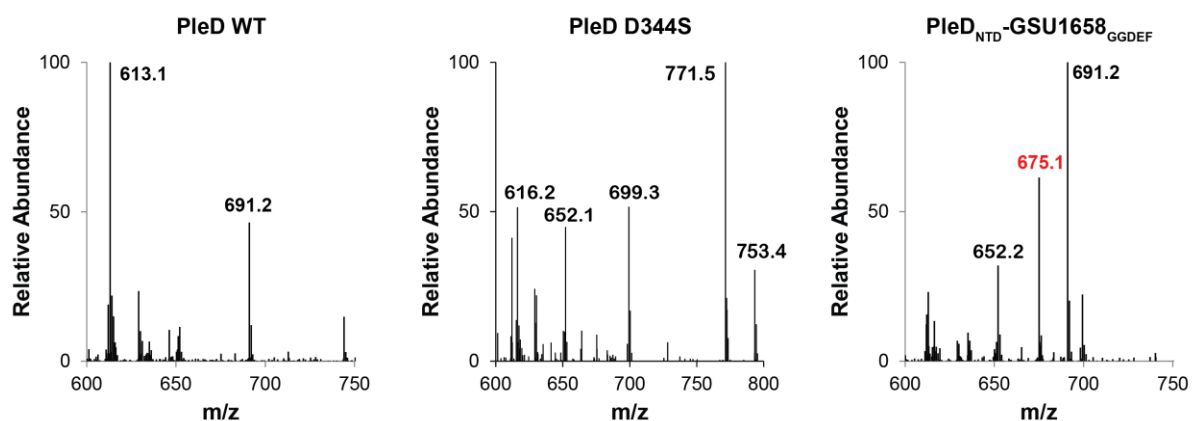

**Figure S12 – HPLC-MS analysis of PleD and associated mutants.** LC/MS analysis of *E. coli* cell extracts overexpressing PleD variants as shown. PleD<sub>NTD</sub>-GSU1658<sub>GGDEF</sub> is a fusion between residues 1-293 of PleD, and residues 297-458 of GSU1658. Shown is the MS spectra from integrating the retention time region containing all three cyclic dinucleotides (6 to 8 min). Expected masses are for cdiG (m/z = 691) and cAG (m/z = 675).

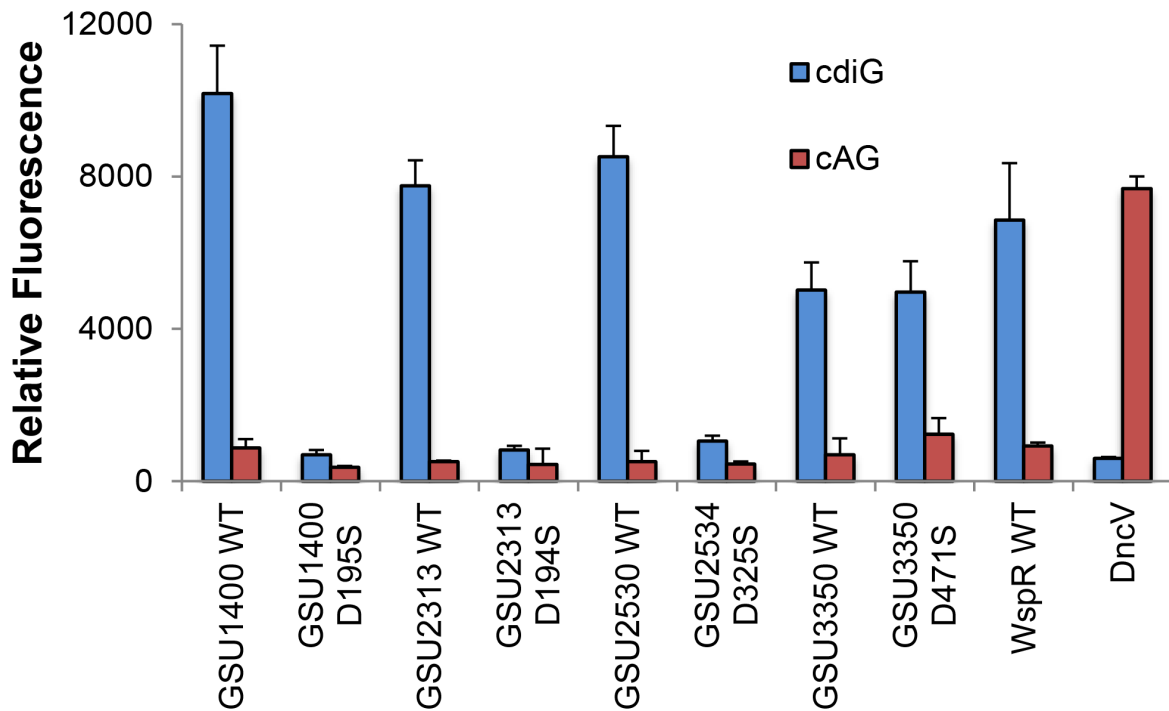

**Figure S13. Analysis of D-to-S mutations of several diguanylate cyclases from *Geobacter sulfurreducens*.** Average fluorescence measured by flow cytometry (n=3, 10,000 cells per run) of *E. coli* BL21 (DE3) Star cells co-expressing the cdiG-selective biosensor DP17-Spinach2 (blue) or cAG-selective biosensor Gm0970-p1-4delA-Spinach (red) along wild-type or selectivity site D-to-S mutants of validated diguanylate cyclases from *G. sulfurreducens* PCA.

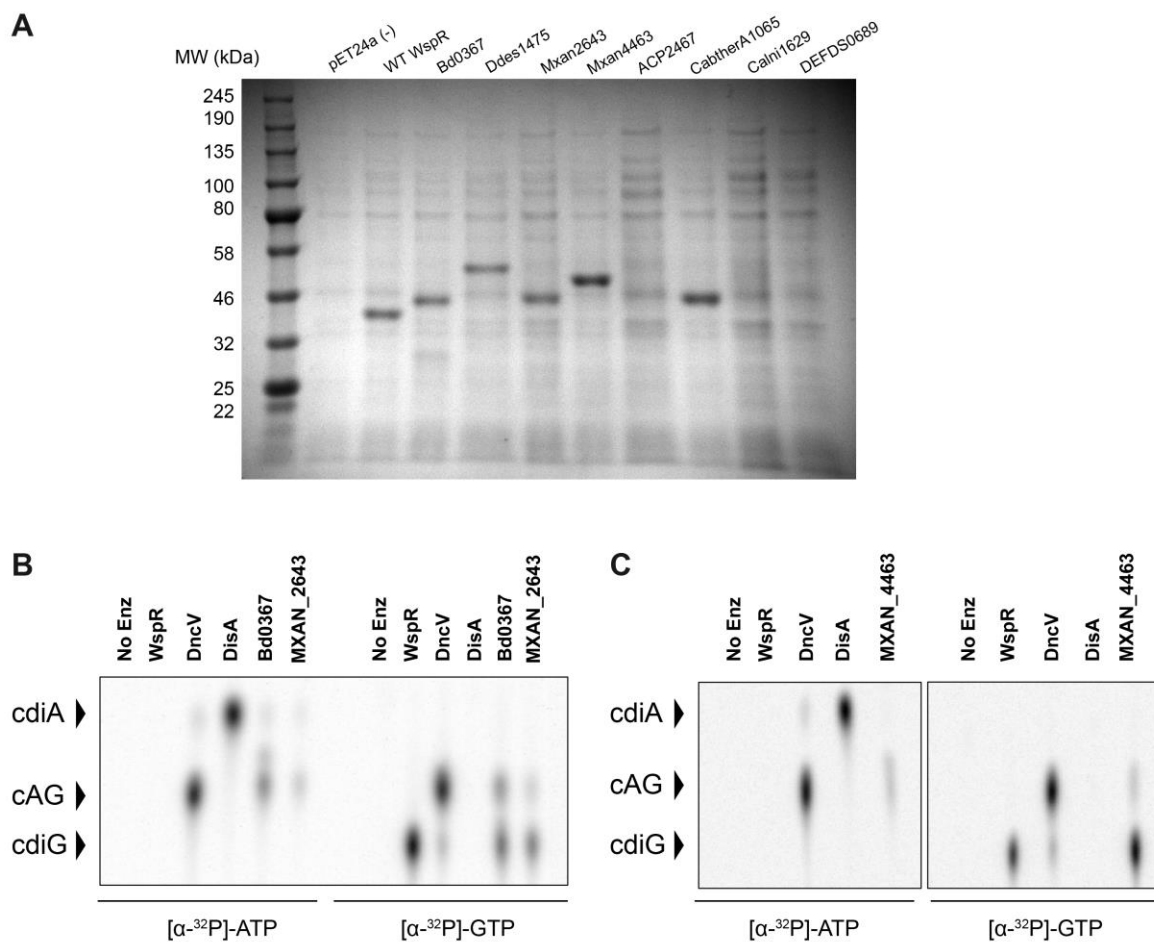

**Figure S14. Activity assay for additional Hypr GGDEF domains. (A)** SDS-PAGE gel analysis of lysates from cells expressing C-terminal 6x-His constructs in pET24a, or (for ACP2467, Calni1629, and DEFDS0689) N-terminal 6x-His-MBP constructs. Gel was stained with GelCode Blue (Thermo Scientific). **(B)** Cellulose thin layer chromatography showing cyclic dinucleotide region of radiolabeled products from enzymatic reactions of MBP-tagged I-site mutations of Bd0367 (R260A) or MXAN\_2643 (R292A) with 1:1 ATP to GTP substrates in excess and doped with trace amounts of  $\alpha$ - $^{32}$ P-labeled GTP or ATP. **(C)** As in (B), with Wild-type C-terminal 6x-His tagged MXAN\_4463.

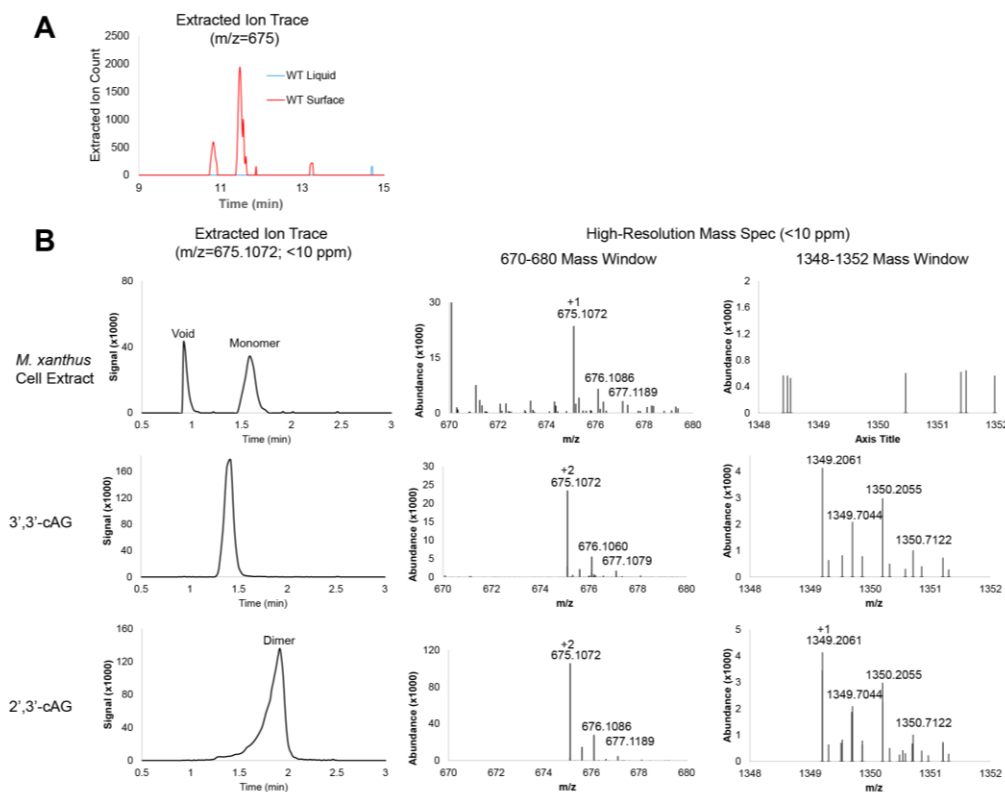

**Figure S15. Mass spectrometry analysis of *Myxococcus xanthus* cell extracts. (A)** Mass spectrometry analysis of second independent biological replicate of *M. xanthus* cell extracts from surface- or liquid-grown WT samples. Shown is the extracted ion trace for cAG (m/z=675) normalized to the weight of extracted cells. The instrumentation and LCMS protocol used in this case was the same as described for *E. coli* cell extract. **(B)** Mass spectrometry analysis of lysate from surface-grown WT *M. xanthus* strain DZ2 or synthetic 3',3'-cAG and 2',3'-cAG standards. Left: Extracted ion trace for cAG (m/z=675.1072). Right: High-resolution mass spectra of the monomer (m/z=675.1072) and dimer (m/z=1349.2064)

Using the same instrumentation as used for analysis of *E. coli* cell extracts, we detect cAG only in WT *M. xanthus* grown on agar surface, not for liquid culture samples.

In the extract from surface-grown *M. xanthus*, we observe two peaks, one at the void volume (1 min), and the other which is intermediate between the retention time of the 3',3' and 2',3' cAG standards. However, the high-resolution mass spectrum shows that it matches the chemical formula for cAG. The slight discrepancy in retention times compared to synthetic standards is because both synthetic standards appear to elute as dimers, as we observe the dimer mass (1349 mass, +1 charge) as well as the 675 mass as a +2-charged species. In contrast, the cAG present in cell extracts elutes as the monomer (675 mass, +1 charge). We further validated that the peak is 3',3'-cAG by tandem MS/MS, as seen in Figure S16.

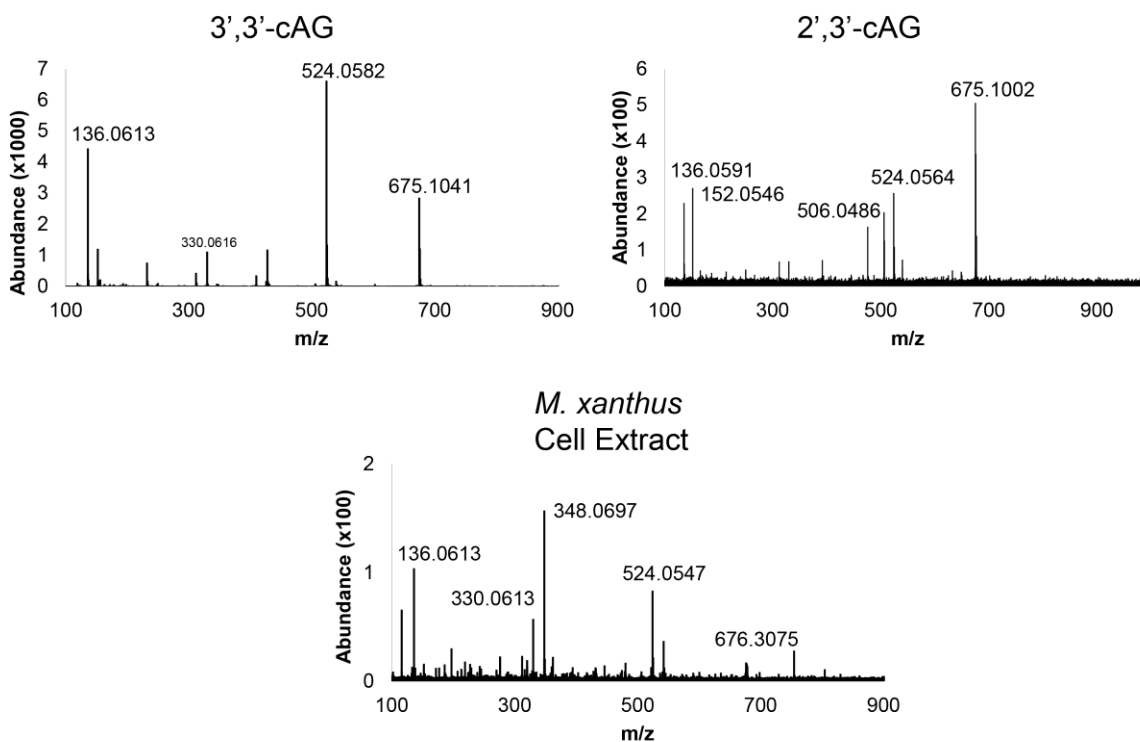

**Figure S16. Tandem MS/MS of parent ion ( $m/z=675.1072$ ) in cyclic dinucleotide standards and *Myxococcus xanthus* cell extracts.**

Tandem MS/MS analysis of the parent ion shows the cAG present in cell extracts has key fragmentations of 136, 330, and 524, which correspond to the 3',3'-cAG synthetic standard. In contrast, the key fragmentation of  $m/z=506$  corresponding to 2',3'-cAG is not observed in the cell extract sample. A related linear dinucleotide containing a 2',3'-cyclic phosphate has been known to have fragmentation masses of  $m/z=152$  and 540 (9), which we do not observe in the cell extract sample. There is one additional peak in the extract tandem MS/MS spectrum corresponding to AMP, which may be attributed to possible fragmentation differences between the monomeric and dimeric forms of the cyclic dinucleotide.



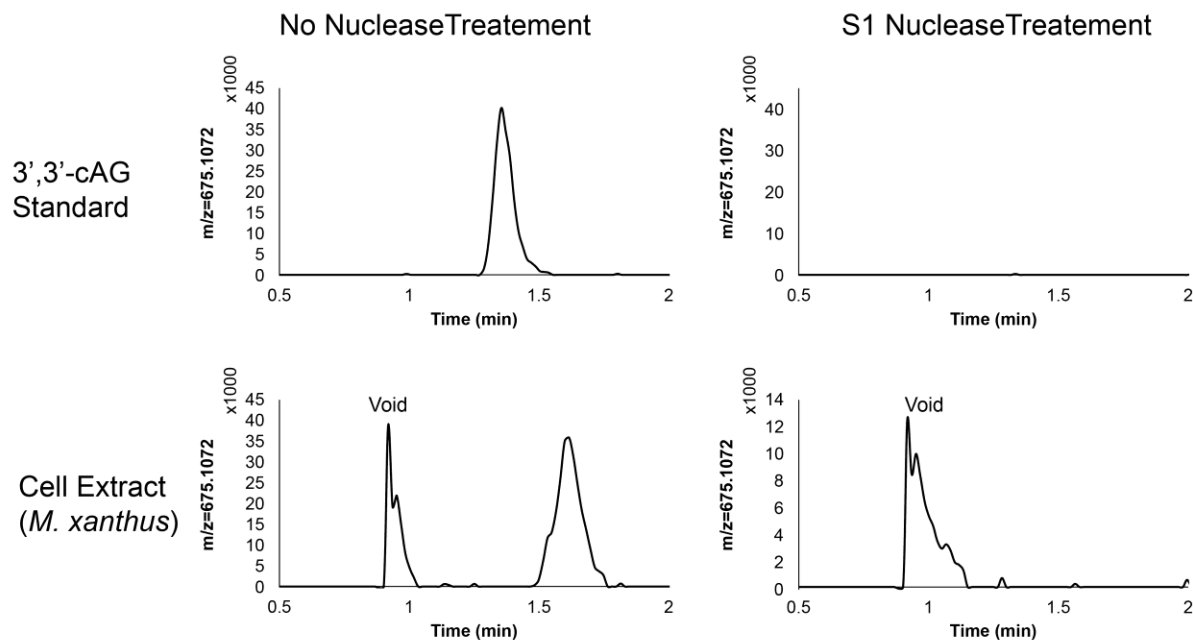

**Figure S17. Effect of nuclease treatment on *Myxococcus xanthus* cell extracts.** Extracted ion trace for  $m/z=675.1075$  with a  $<10$  ppm cutoff of 3',3'-cAG standard (Top) or *M. xanthus* strain DZ2 extracts (bottom) untreated (Left) or treated with S1 Nuclease (Right).

S1 nuclease cleaves 3'-5' phosphodiester bonds, and is shown to cleave 3',3'-cAG. As shown, S1 nuclease is able to cleave both  $m/z=675$  peaks occurring at the void volume and at  $\sim 1.6$  min in the *M. xanthus* cell extract, further supporting our assignment for the compound as 3',3'-cAG.

**Table S1. GGDEFs containing variant residues at the PleD 344 alignment position.** Genes listed are only those which possess a functional GGDEF motif, which we consider [G/A/S]G[D/E]EF.

| UniProt KB Accession | Gene names   | Organism                                                                                                     | Selectivity Residue |
|----------------------|--------------|--------------------------------------------------------------------------------------------------------------|---------------------|
| A3IYP6               | CY0110_05007 | <i>Cyanothece</i> sp. CCY0110                                                                                | Y                   |
| A1ALA3               | Ppro_0492    | <i>Pelobacter propionicus</i> (strain DSM 2379)                                                              | T                   |
| A5G6K7               | Gura_3266    | <i>Geobacter uraniireducens</i> (strain Rf4) ( <i>Geobacter uraniumreducens</i> )                            | T                   |
| B5EC68               | Gbem_3531    | <i>Geobacter bemidjensis</i> (strain Bem / ATCC BAA-1014 / DSM 16622)                                        | T                   |
| C6E666               | GM21_3597    | <i>Geobacter</i> sp. (strain M21)                                                                            | T                   |
| D3PC46               | DEFDS_0689   | <i>Deferribacter desulfuricans</i> (strain DSM 14783 / JCM 11476 / NBRC 101012 / SSM1)                       | T                   |
| E1WZI7               | BMS_1301     | <i>Halobacteriovorax marinus</i> (strain ATCC BAA-682 / DSM 15412 / SJ) ( <i>Bacteriovorax marinus</i> )     | T                   |
| E8WQD1               | GM18_0558    | <i>Geobacter</i> sp. (strain M18)                                                                            | T                   |
| Q46S25               | Reut_B4711   | <i>Cupriavidus pinatubonensis</i> (strain JMP 134 / LMG 1197) ( <i>Ralstonia eutropha</i> (strain JMP 134))  | T                   |
| A1ANS6               | Ppro_1380    | <i>Pelobacter propionicus</i> (strain DSM 2379)                                                              | S                   |
| A5GF71               | Gura_1886    | <i>Geobacter uraniireducens</i> (strain Rf4) ( <i>Geobacter uraniumreducens</i> )                            | S                   |
| A7HAD5               | Anae109_1474 | <i>Anaeromyxobacter</i> sp. (strain Fw109-5)                                                                 | S                   |
| B3E1R0               | Glov_1844    | <i>Geobacter lovleyi</i> (strain ATCC BAA-1151 / DSM 17278 / SZ)                                             | S                   |
| B3EB82               | Glov_1760    | <i>Geobacter lovleyi</i> (strain ATCC BAA-1151 / DSM 17278 / SZ)                                             | S                   |
| B4UJZ3               | AnaeK_1471   | <i>Anaeromyxobacter</i> sp. (strain K)                                                                       | S                   |
| B5E8T5               | Gbem_3097    | <i>Geobacter bemidjensis</i> (strain Bem / ATCC BAA-1014 / DSM 16622)                                        | S                   |
| B8EMQ6               | Msil_3853    | <i>Methylocella silvestris</i> (strain BL2 / DSM 15510 / NCIMB 13906)                                        | S                   |
| B8J0V0               | Ddes_1475    | <i>Desulfovibrio desulfuricans</i> (strain ATCC 27774 / DSM 6949)                                            | S                   |
| B8J555               | A2cp1_1566   | <i>Anaeromyxobacter dehalogenans</i> (strain 2CP-1 / ATCC BAA-258)                                           | S                   |
| B9M0W8               | Geob_2621    | <i>Geobacter daltonii</i> (strain DSM 22248 / JCM 15807 / FRC-32)                                            | S                   |
| C0QB51               | HRM2_17460   | <i>Desulfobacterium autotrophicum</i> (strain ATCC 43914 / DSM 3382 / HRM2)                                  | S                   |
| C1F1G0               | ACP_2467     | <i>Acidobacterium capsulatum</i> (strain ATCC 51196 / DSM 11244 / JCM 7670 / NBRC 15755 / NCIMB 13165 / 161) | S                   |
| C6E353               | GM21_1165    | <i>Geobacter</i> sp. (strain M21)                                                                            | S                   |
| C7QHC7               | Caci_0111    | <i>Catenulispora acidiphila</i> (strain DSM 44928 / NRRL B-24433 / NBRC 102108 / JCM 14897)                  | S                   |
| E3FYP4               | STaur_3377   | <i>Stigmatella aurantiaca</i> (strain DW4/3-1)                                                               | S                   |
| E3T615               |              | uncultured bacterium 293                                                                                     | S                   |
| E4TFG3               | Calni_1629   | <i>Calditerrivibrio nitroreducens</i> (strain DSM 19672 / NBRC 101217 / Yu37-1)                              | S                   |
| E6PWY9               | CARN3_0369   | mine drainage metagenome                                                                                     | S                   |
| E8RE90               | Despr_2994   | <i>Desulfobulbus propionicus</i> (strain ATCC 33891 / DSM 2032 / 1pr3)                                       | S                   |
| E8V865               | AciPR4_3292  | <i>Terriglobus saanensis</i> (strain ATCC BAA-1853 / DSM 23119 / SP1PR4)                                     | S                   |
| E8WHW1               | GM18_3068    | <i>Geobacter</i> sp. (strain M18)                                                                            | S                   |
| E8WYM1               | AciX9_0547   | <i>Granulicella tundricola</i> (strain ATCC BAA-1859 / DSM 23138 / MP5ACTX9)                                 | S                   |
| F2NID6               | Desac_2520   | <i>Desulfobacca acetoxidans</i> (strain ATCC 700848 / DSM 11109 / ASRB2)                                     | S                   |
| F8CEK8               | LILAB_20895  | <i>Myxococcus fulvus</i> (strain ATCC BAA-855 / HW-1)                                                        | S                   |

|        |                           |                                                                                                                                                               |   |
|--------|---------------------------|---------------------------------------------------------------------------------------------------------------------------------------------------------------|---|
| F8CQQ7 | LILAB_30450               | <i>Myxococcus fulvus</i> (strain ATCC BAA-855 / HW-1)                                                                                                         | S |
| G2LH77 | Cabther_A1065             | <i>Chloracidobacterium thermophilum</i> (strain B)                                                                                                            | S |
| H8MHV0 | pleD2 COCOR_03316         | <i>Coralloccoccus coralloides</i> (strain ATCC 25202 / DSM 2259 / NBRC 100086 / M2) ( <i>Myxococcus coralloides</i> )                                         | S |
| H8MXI3 | cph2C COCOR_05401         | <i>Coralloccoccus coralloides</i> (strain ATCC 25202 / DSM 2259 / NBRC 100086 / M2) ( <i>Myxococcus coralloides</i> )                                         | S |
| Q08TQ2 | STIAU_4749                | <i>Stigmatella aurantiaca</i> (strain DW4/3-1)                                                                                                                | S |
| Q08YB4 | STIAUR_4818<br>STIAU_0908 | <i>Stigmatella aurantiaca</i> (strain DW4/3-1)                                                                                                                | S |
| Q1D3Y9 | MXAN_4463                 | <i>Myxococcus xanthus</i> (strain DK 1622)                                                                                                                    | S |
| Q1D911 | MXAN_2643                 | <i>Myxococcus xanthus</i> (strain DK 1622)                                                                                                                    | S |
| Q1IKE0 | Acid345_3659              | <i>Koribacter versatilis</i> (strain Ellin345)                                                                                                                | S |
| Q1JVE0 | Dace_0065                 | <i>Desulfuromonas acetoxidans</i> DSM 684                                                                                                                     | S |
| Q2IKI3 | Adeh_2393                 | <i>Anaeromyxobacter dehalogenans</i> (strain 2CP-C)                                                                                                           | S |
| Q39UD1 | Gmet_1914                 | <i>Geobacter metallireducens</i> (strain GS-15 / ATCC 53774 / DSM 7210)                                                                                       | S |
| Q3A5R5 | Pcar_1042                 | <i>Pelobacter carbinolicus</i> (strain DSM 2380 / Gra Bd 1)                                                                                                   | S |
| Q5ZPC6 |                           | <i>Angiococcus disciformis</i>                                                                                                                                | S |
| Q6MQU2 | pleD Bd0367               | <i>Bdellovibrio bacteriovorus</i> (strain ATCC 15356 / DSM 50701 / NCIB 9529 / HD100)                                                                         | S |
| Q74CL4 | GSU1658                   | <i>Geobacter sulfurreducens</i> (strain ATCC 51573 / DSM 12127 / PCA)                                                                                         | S |
| A0AK16 | lwe1930                   | <i>Listeria welshimeri</i> serovar 6b (strain ATCC 35897 / DSM 20650 / SLCC5334)                                                                              | N |
| A0AK17 | lwe1931                   | <i>Listeria welshimeri</i> serovar 6b (strain ATCC 35897 / DSM 20650 / SLCC5334)                                                                              | N |
| A0Q1B8 | NT01CX_2347               | <i>Clostridium novyi</i> (strain NT)                                                                                                                          | N |
| A0YR26 | L8106_11667               | <i>Lyngbya</i> sp. (strain PCC 8106) ( <i>Lyngbya aestuarii</i> (strain CCY9616))                                                                             | N |
| A1S6Z8 | Sama_1949                 | <i>Shewanella amazonensis</i> (strain ATCC BAA-1098 / SB2B)                                                                                                   | N |
| A1SR97 | Ping_0142                 | <i>Psychromonas ingrahamii</i> (strain 37)                                                                                                                    | N |
| A1SZB6 | Ping_3143                 | <i>Psychromonas ingrahamii</i> (strain 37)                                                                                                                    | N |
| A1UF51 | Mkms_2261                 | <i>Mycobacterium</i> sp. (strain KMS)                                                                                                                         | N |
| A3DC33 | Cthe_0273                 | <i>Clostridium thermocellum</i> (strain ATCC 27405 / DSM 1237 / NBRC 103400 / NCIMB 10682 / NRRL B-4536 / VPI 7372) ( <i>Ruminiclostridium thermocellum</i> ) | N |
| A3IWY5 | CY0110_23131              | <i>Cyanothece</i> sp. CCY0110                                                                                                                                 | N |
| A3YE50 | MED121_21460              | <i>Marinomonas</i> sp. MED121                                                                                                                                 | N |
| A4B9U6 | MED297_20957              | <i>Reinekea blandensis</i> MED297                                                                                                                             | N |
| A4BH36 | MED297_14975              | <i>Reinekea blandensis</i> MED297                                                                                                                             | N |
| A4E847 | COLAER_00587              | <i>Collinsella aerofaciens</i> ATCC 25986                                                                                                                     | N |
| A4U2M2 | MGR_1840                  | <i>Magnetospirillum gryphiswaldense</i>                                                                                                                       | N |
| A5VMQ1 | Lreu_1888                 | <i>Lactobacillus reuteri</i> (strain DSM 20016)                                                                                                               | N |
| A5ZSV1 | RUMOBE_02079              | <i>Blautia obeum</i> ATCC 29174                                                                                                                               | N |
| A6CN78 | BSG1_01135                | <i>Bacillus</i> sp. SG-1                                                                                                                                      | N |
| A6TIC3 | KPN_pKPN3p05967           | <i>Klebsiella pneumoniae</i> subsp. <i>pneumoniae</i> (strain ATCC 700721 / MGH 78578)                                                                        | N |
| A6VRU9 | Mmwy1_0236                | <i>Marinomonas</i> sp. (strain MWYL1)                                                                                                                         | N |
| A8DJI0 | YS_M60-F11.073            | <i>Chloracidobacterium thermophilum</i>                                                                                                                       | N |

|        |                              |                                                                                                            |   |
|--------|------------------------------|------------------------------------------------------------------------------------------------------------|---|
| A8DW58 | v1g49651                     | <i>Nematostella vectensis</i> (Starlet sea anemone)                                                        | N |
| A8G1K2 | Ssed_4373                    | <i>Shewanella sediminis</i> (strain HAW-EB3)                                                               | N |
| A8GYS2 | Spea_0130                    | <i>Shewanella pealeana</i> (strain ATCC 700345 / ANG-SQ1)                                                  | N |
| A8GZL9 | Spea_0428                    | <i>Shewanella pealeana</i> (strain ATCC 700345 / ANG-SQ1)                                                  | N |
| A8RMS1 | CLOBOL_02006                 | <i>Clostridium bolteae</i> (strain ATCC BAA-613 / WAL 16351)                                               | N |
| A8S3F1 | CLOBOL_06594                 | <i>Clostridium bolteae</i> (strain ATCC BAA-613 / WAL 16351)                                               | N |
| A8UBZ9 | CAT7_10515                   | <i>Carnobacterium</i> sp. AT7                                                                              | N |
| A8UU60 | HG1285_16780                 | <i>Hydrogenivirga</i> sp. 128-5-R1-1                                                                       | N |
| A9AXC8 | Haur_4216                    | <i>Herpetosiphon aurantiacus</i> (strain ATCC 23779 / DSM 785)                                             | N |
| A9D5G8 | KT99_02136                   | <i>Shewanella benthica</i> KT99                                                                            | N |
| B0C8G1 | AM1_5154                     | <i>Acaryochloris marina</i> (strain MBIC 11017)                                                            | N |
| B0JT77 | MAE_12990                    | <i>Microcystis aeruginosa</i> (strain NIES-843)                                                            | N |
| B0TJH3 | Shal_2411                    | <i>Shewanella halifaxensis</i> (strain HAW-EB4)                                                            | N |
| B0TMZ0 | Shal_4188                    | <i>Shewanella halifaxensis</i> (strain HAW-EB4)                                                            | N |
| B1BA96 | CBC_A0861                    | <i>Clostridium botulinum</i> C str. Eklund                                                                 | N |
| B1KNY3 | Swoo_4765                    | <i>Shewanella woodyi</i> (strain ATCC 51908 / MS32)                                                        | N |
| B1LZ02 | Mrad2831_2428                | <i>Methylobacterium radiotolerans</i> (strain ATCC 27329 / DSM 1819 / JCM 2831)                            | N |
| B1MWP5 | LCK_00134                    | <i>Leuconostoc citreum</i> (strain KM20)                                                                   | N |
| B1WSQ7 | cce_4288                     | <i>Cyanothece</i> sp. (strain ATCC 51142)                                                                  | N |
| B1XL77 | SYNPCC7002_A2587             | <i>Synechococcus</i> sp. (strain ATCC 27264 / PCC 7002 / PR-6) ( <i>Agmenellum quadruplicatum</i> )        | N |
| B2A0U2 | Nther_2407                   | <i>Natranaerobius thermophilus</i> (strain ATCC BAA-1301 / DSM 18059 / JW/NM-WN-LF)                        | N |
| B2A818 | Nther_2224                   | <i>Natranaerobius thermophilus</i> (strain ATCC BAA-1301 / DSM 18059 / JW/NM-WN-LF)                        | N |
| B2J5G5 | Npun_R3941                   | <i>Nostoc punctiforme</i> (strain ATCC 29133 / PCC 73102)                                                  | N |
| B3PET3 | CJA_1657                     | <i>Cellvibrio japonicus</i> (strain Ueda107) ( <i>Pseudomonas fluorescens</i> subsp. <i>cellulosa</i> )    | N |
| B5JXV5 | GP5015_1671                  | <i>gamma proteobacterium</i> HTCC5015                                                                      | N |
| B5U200 |                              | uncultured bacterium                                                                                       | N |
| B6ARH3 | CGL2_11390004                | <i>Leptospirillum</i> sp. Group II '5-way CG'                                                              | N |
| B6BGA1 | SMGD1_1002                   | <i>Sulfurimonas gotlandica</i> (strain DSM 19862 / JCM 16533 / GD1)                                        | N |
| B6BIR1 | SMGD1_1897                   | <i>Sulfurimonas gotlandica</i> (strain DSM 19862 / JCM 16533 / GD1)                                        | N |
| B6WPU3 | DESPIG_00058                 | <i>Desulfovibrio piger</i> ATCC 29098                                                                      | N |
| B7KYX3 | Mchl_0308                    | <i>Methylobacterium extorquens</i> (strain CM4 / NCIMB 13688) ( <i>Methylobacterium chloromethanicum</i> ) | N |
| B8CH18 | swp_0168                     | <i>Shewanella piezotolerans</i> (strain WP3 / JCM 13877)                                                   | N |
| B8D025 | Hore_21320                   | <i>Halothermothrix orenii</i> (strain H 168 / OCM 544 / DSM 9562)                                          | N |
| C0BQ78 | BBPC_0428<br>BIFPSEUDO_02518 | <i>Bifidobacterium pseudocatenulatum</i> DSM 20438 = JCM 1200 = LMG 10505                                  | N |
| C0BWF0 | CLOHYLEM_04111               | [ <i>Clostridium</i> ] <i>hylemonae</i> DSM 15053                                                          | N |
| C0D7P9 | CLOSTASPAR_05296             | [ <i>Clostridium</i> ] <i>asparagiforme</i> DSM 15981                                                      | N |
| C0QXE8 | BHWA1_00306                  | <i>Brachyspira hyodysenteriae</i> (strain ATCC 49526 / WA1)                                                | N |
| C0WEP4 | ACDG_01935                   | <i>Acidaminococcus</i> sp. D21                                                                             | N |

|        |                    |                                                                                                                   |   |
|--------|--------------------|-------------------------------------------------------------------------------------------------------------------|---|
| C0YZG5 | HMPREF0535_1180    | <i>Lactobacillus reuteri</i> MM2-3                                                                                | N |
| C2EFU2 | HMPREF0545_0514    | <i>Lactobacillus salivarius</i> DSM 20555 = ATCC 11741                                                            | N |
| C2EUE6 | HMPREF0549_1082    | <i>Lactobacillus vaginalis</i> DSM 5837 = ATCC 49540                                                              | N |
| C2JZI8 | HMPREF0539_2323    | <i>Lactobacillus rhamnosus</i> LMS2-1                                                                             | N |
| C5EJH1 | CBFG_00456         | <i>Clostridiales bacterium</i> 1_7_47FAA                                                                          | N |
| C6WVK8 | Amir_0355          | <i>Actinosynnema mirum</i> (strain ATCC 29888 / DSM 43827 / NBRC 14064 / IMRU 3971)                               | N |
| C6WVQ3 | Mmol_1094          | <i>Methylothermobacter mobilis</i> (strain JLW8 / ATCC BAA-1282 / DSM 17540)                                      | N |
| C7XH20 | HMPREF0545_00103   | <i>Lactobacillus crispatus</i> 125-2-CHN                                                                          | N |
| C9A618 | ECBG_00198         | <i>Enterococcus casseliflavus</i> EC20                                                                            | N |
| C9AAA1 | ECBG_01681         | <i>Enterococcus casseliflavus</i> EC20                                                                            | N |
| C9CHJ5 | ECAG_00228         | <i>Enterococcus casseliflavus</i> EC10                                                                            | N |
| C9CIF0 | ECAG_00128         | <i>Enterococcus casseliflavus</i> EC10                                                                            | N |
| C9CKC7 | ECAG_01191         | <i>Enterococcus casseliflavus</i> EC10                                                                            | N |
| C9YL14 | CDR20291_1266      | <i>Peptoclostridium difficile</i> (strain R20291) ( <i>Clostridium difficile</i> )                                | N |
| D0DEJ0 | HMPREF0508_00079   | <i>Lactobacillus crispatus</i> MV-3A-US                                                                           | N |
| D1C7L1 | Sthe_0405          | <i>Sphaerobacter thermophilus</i> (strain DSM 20745 / S 6022)                                                     | N |
| D1CCW0 | Tter_1719          | <i>Thermobaculum terrenum</i> (strain ATCC BAA-798 / YNP1)                                                        | N |
| D2RKZ4 | Acfer_1386         | <i>Acidaminococcus fermentans</i> (strain ATCC 25085 / DSM 20731 / VR4)                                           | N |
| D2RKZ5 | Acfer_1387         | <i>Acidaminococcus fermentans</i> (strain ATCC 25085 / DSM 20731 / VR4)                                           | N |
| D4CHU0 | CLOM621_09029      | <i>Clostridium</i> sp. M62/1                                                                                      | N |
| D4IYS5 | CIY_00120          | <i>Butyrivibrio fibrisolvens</i> 16/4                                                                             | N |
| D4LR02 | CK5_18170          | <i>Blautia obeum</i> A2-162                                                                                       | N |
| D4LW73 | CK5_02480          | <i>Blautia obeum</i> A2-162                                                                                       | N |
| D4MNV8 | CL3_00230          | butyrate-producing bacterium SM4/1                                                                                | N |
| D5Q675 | HMPREF0220_2407    | <i>Peptoclostridium difficile</i> NAP08                                                                           | N |
| D5S2D4 | HMPREF0219_2715    | <i>Peptoclostridium difficile</i> NAP07                                                                           | N |
| D5U625 | Bmur_0413          | <i>Brachyspira murdochii</i> (strain ATCC 51284 / DSM 12563 / 56-150) ( <i>Serpulina murdochii</i> )              | N |
| D5XCW0 | TherJR_2804        | <i>Thermincola potens</i> (strain JR)                                                                             | N |
| D6DM36 | CLS_36110          | [ <i>Clostridium</i> ] cf. <i>saccharolyticum</i> K10                                                             | N |
| D6XT12 | Bsel_1436          | <i>Bacillus selenitireducens</i> (strain ATCC 700615 / DSM 15326 / MLS10)                                         | N |
| D6XZ65 | Bsel_2859          | <i>Bacillus selenitireducens</i> (strain ATCC 700615 / DSM 15326 / MLS10)                                         | N |
| D7CN39 | Slip_1361          | <i>Syntrophothermus lipocalidus</i> (strain DSM 12680 / TGB-C1)                                                   | N |
| D8IA76 | BP951000_2233      | <i>Brachyspira pilosicoli</i> (strain ATCC BAA-1826 / 95/1000)                                                    | N |
| D9S411 | FSU_2241           | <i>Fibrobacter succinogenes</i> (strain ATCC 19169 / S85)                                                         | N |
| D9T0X8 | Micau_1801         | <i>Micromonospora aurantiaca</i> (strain ATCC 27029 / DSM 43813 / JCM 10878 / NBRC 16125 / INA 9442)              | N |
| D9T2P9 | Micau_6102         | <i>Micromonospora aurantiaca</i> (strain ATCC 27029 / DSM 43813 / JCM 10878 / NBRC 16125 / INA 9442)              | N |
| E0RAP7 | PPE_01378          | <i>Paenibacillus polymyxa</i> (strain E681)                                                                       | N |
| E0S298 | bpr_11183          | <i>Butyrivibrio proteoclasticus</i> (strain ATCC 51982 / DSM 14932 / B316) ( <i>Clostridium proteoclasticum</i> ) | N |
| E0SCN2 | yddV Dda3937_02950 | <i>Dickeya dadantii</i> (strain 3937) ( <i>Erwinia chrysanthemi</i> (strain 3937))                                | N |

|        |                  |                                                                                                                                         |   |
|--------|------------------|-----------------------------------------------------------------------------------------------------------------------------------------|---|
| E1IH26 | OSCT_2627        | <i>Oscillochloris trichoides</i> DG-6                                                                                                   | N |
| E1QZ42 | Olsu_0541        | <i>Olsenella uli</i> (strain ATCC 49627 / DSM 7084 / CIP 109912 / JCM 12494 / VPI D76D-27C) ( <i>Lactobacillus uli</i> )                | N |
| E2SNJ1 | HMPREF0983_02712 | <i>Erysipelotrichaceae</i> bacterium 3_1_53                                                                                             | N |
| E3EFH1 | PPSC2_07110      | <i>Paenibacillus polymyxa</i> (strain SC2) ( <i>Bacillus polymyxa</i> )                                                                 | N |
| E3R434 | LBKG_01059       | <i>Lactobacillus crispatus</i> CTV-05                                                                                                   | N |
| E3YRK3 | NT05LM_2248      | <i>Listeria marthii</i> FSL S4-120                                                                                                      | N |
| E3YRK4 | NT05LM_2249      | <i>Listeria marthii</i> FSL S4-120                                                                                                      | N |
| E3ZRW6 | NT03LS_2247      | <i>Listeria seeligeri</i> FSL N1-067                                                                                                    | N |
| E3ZRW7 | NT03LS_2248      | <i>Listeria seeligeri</i> FSL N1-067                                                                                                    | N |
| E4NFT5 | KSE_45840        | <i>Kitasatospora setae</i> (strain ATCC 33774 / DSM 43861 / JCM 3304 / KCC A-0304 / NBRC 14216 / KM-6054) ( <i>Streptomyces setae</i> ) | N |
| E5WJ43 | HMPREF1013_02467 | <i>Bacillus</i> sp. 2_A_57_CT2                                                                                                          | N |
| E5Y1N9 | HMPREF0179_00110 | <i>Bilophila wadsworthia</i> 3_1_6                                                                                                      | N |
| E6QNG4 | CARN6_2294       | mine drainage metagenome                                                                                                                | N |
| E6TZP4 | Bcell_3107       | <i>Bacillus cellulosilyticus</i> (strain ATCC 21833 / DSM 2522 / FERM P-1141 / JCM 9156 / N-4)                                          | N |
| E6U113 | Bcell_2063       | <i>Bacillus cellulosilyticus</i> (strain ATCC 21833 / DSM 2522 / FERM P-1141 / JCM 9156 / N-4)                                          | N |
| E6VA14 | Varpa_3212       | <i>Variovorax paradoxus</i> (strain EPS)                                                                                                | N |
| E7GSI6 | HMPREF9474_03881 | [ <i>Clostridium</i> ] <i>symbiosum</i> WAL-14163                                                                                       | N |
| E8WZ00 | AciX9_2892       | <i>Granulicella tundricola</i> (strain ATCC BAA-1859 / DSM 23138 / MP5ACTX9)                                                            | N |
| E9USG8 | NBCG_01687       | <i>Nocardioideae</i> bacterium Broad-1                                                                                                  | N |
| F0EFX9 | HMPREF9087_0076  | <i>Enterococcus casseliflavus</i> ATCC 12755                                                                                            | N |
| F0EJB5 | HMPREF9087_1553  | <i>Enterococcus casseliflavus</i> ATCC 12755                                                                                            | N |
| F0EPR5 | HMPREF9087_3407  | <i>Enterococcus casseliflavus</i> ATCC 12755                                                                                            | N |
| F0RXB1 | SpiBuddy_0117    | <i>Sphaerochaeta globosa</i> (strain ATCC BAA-1886 / DSM 22777 / Buddy) ( <i>Spirochaeta</i> sp. (strain Buddy))                        | N |
| F0SZ73 | Sgly_2922        | <i>Syntrophobotulus glycolicus</i> (strain DSM 8271 / FIGlyR)                                                                           | N |
| F2F2E2 | SSIL_0971        | <i>Solibacillus silvestris</i> (strain StLB046) ( <i>Bacillus silvestris</i> )                                                          | N |
| F2M179 | LAB52_07155      | <i>Lactobacillus amylovorus</i> (strain GRL 1118)                                                                                       | N |
| F3LIZ8 | IMCC1989_1671    | <i>gamma</i> proteobacterium IMCC1989                                                                                                   | N |
| F3MTT0 | AAULR_17209      | <i>Lactobacillus rhamnosus</i> MTCC 5462                                                                                                | N |
| F3S3A2 | SXCC_00522       | <i>Gluconacetobacter</i> sp. SXCC-1                                                                                                     | N |
| F4AAH9 | CbC4_1639        | <i>Clostridium botulinum</i> BKT015925                                                                                                  | N |
| F4BN82 | yhck CAR_c18940  | <i>Carnobacterium</i> sp. (strain 17-4)                                                                                                 | N |
| F4FH21 | VAB18032_07575   | <i>Verrucosipora maris</i> (strain AB-18-032)                                                                                           | N |
| F5JFM0 | AGRO_3972        | <i>Agrobacterium</i> sp. ATCC 31749                                                                                                     | N |
| F5LAL3 | CathTA2_2948     | <i>Caldalkalibacillus thermarum</i> TA2.A1                                                                                              | N |
| F5LCV7 | HMPREF9413_3556  | <i>Paenibacillus</i> sp. HGF7                                                                                                           | N |
| F6B3T5 | Desca_2416       | <i>Desulfotomaculum carboxydivorans</i> (strain DSM 14880 / VKM B-2319 / CO-1-SRB)                                                      | N |
| F6CN01 | Desku_3271       | <i>Desulfotomaculum kuznetsovii</i> (strain DSM 6115 / VKM B-1805 / 17)                                                                 | N |
| F7QUH5 | LSGJ_00968       | <i>Lactobacillus salivarius</i> GJ-24                                                                                                   | N |

|        |                    |                                                                                              |   |
|--------|--------------------|----------------------------------------------------------------------------------------------|---|
| F7S1E1 | A28LD_2356         | <i>Idiomarina</i> sp. A28L                                                                   | N |
| F7UXQ1 | EGYY_28350         | <i>Eggerthella</i> sp. (strain YY7918)                                                       | N |
| F8CDF6 | LILAB_26855        | <i>Myxococcus fulvus</i> (strain ATCC BAA-855 / HW-1)                                        | N |
| F8FBD9 | KNP414_03968       | <i>Paenibacillus mucilaginosus</i> (strain KNP414)                                           | N |
| F8I0J4 | WKK_01730          | <i>Weissella koreensis</i> (strain KACC 15510)                                               | N |
| F8KDS1 | LRATCC53608_0991   | <i>Lactobacillus reuteri</i> ATCC 53608                                                      | N |
| F9DPS8 | HMPREF9372_0808    | <i>Sporosarcina newyorkensis</i> 2681                                                        | N |
| F9S3C5 | VII00023_19474     | <i>Vibrio ichthyenteri</i> ATCC 700023                                                       | N |
| F9UBV0 | ThimaDRAFT_2402    | <i>Thiocapsa marina</i> 5811                                                                 | N |
| G0EP50 | Bint_1301          | <i>Brachyspira intermedia</i> (strain ATCC 51140 / PWS/A) ( <i>Serpulina intermedia</i> )    | N |
| G0VQR3 | MELS_1543          | <i>Megasphaera elsdenii</i> DSM 20460                                                        | N |
| G1V667 | HMPREF0178_03014   | <i>Bilophila</i> sp. 4_1_30                                                                  | N |
| G2DZG9 | ThidrDRAFT_1432    | <i>Thiorhodococcus drewsii</i> AZ1                                                           | N |
| G2LDT7 | Cabther_A2208      | <i>Chloracidobacterium thermophilum</i> (strain B)                                           | N |
| G2LE99 | Cabther_A0561      | <i>Chloracidobacterium thermophilum</i> (strain B)                                           | N |
| G2MXY0 | Thewi_2388         | <i>Thermoanaerobacter wiegeli</i> Rt8.B1                                                     | N |
| G2ZC65 | LIV_1891           | <i>Listeria ivanovii</i> (strain ATCC BAA-678 / PAM 55)                                      | N |
| G2ZC66 | LIV_1892           | <i>Listeria ivanovii</i> (strain ATCC BAA-678 / PAM 55)                                      | N |
| G3J2F6 | Mettu_3032         | <i>Methylobacter tundripaludum</i> SV96                                                      | N |
| G4L0E2 | OBV_17720          | <i>Oscillibacter valericigenes</i> (strain DSM 18026 / NBRC 101213 / Sjm18-20)               | N |
| G4Q567 | Acin_0817          | <i>Acidaminococcus intestini</i> (strain RyC-MR95)                                           | N |
| G5FI24 | HMPREF1020_04120   | <i>Clostridium</i> sp. 7_3_54FAA                                                             | N |
| G5HCX5 | HMPREF9469_00437   | [ <i>Clostridium</i> ] <i>citroniae</i> WAL-17108                                            | N |
| G6B9S8 | HMPREF1122_02608   | <i>Peptoclostridium difficile</i> 002-P50-2011                                               | N |
| G6BFS5 | HMPREF1123_00856   | <i>Peptoclostridium difficile</i> 050-P50-2011                                               | N |
| G6FMV2 | FJSC11DRAFT_0199   | <i>Fischerella</i> sp. JSC-11                                                                | N |
| G6XN69 | ATCR1_00425        | <i>Agrobacterium tumefaciens</i> CCNWGS0286                                                  | N |
| G7M2F7 | CDLVIII_2446       | <i>Clostridium</i> sp. DL-VIII                                                               | N |
| G7RV34 | PUUH_pUUH2392p0067 | <i>Klebsiella pneumoniae</i>                                                                 | N |
| G7VXU3 | HPL003_15520       | <i>Paenibacillus terrae</i> (strain HPL-003)                                                 | N |
| G8PE99 | PECL_22            | <i>Pediococcus clausenii</i> (strain ATCC BAA-344 / DSM 14800 / JCM 18046 / KCTC 3811 / P06) | N |
| G8QI44 | Dsui_3113          | <i>Azospira oryzae</i> (strain ATCC BAA-33 / DSM 13638 / PS) ( <i>Dechlorosoma suillum</i> ) | N |
| G8QIN9 | Dsui_3167          | <i>Azospira oryzae</i> (strain ATCC BAA-33 / DSM 13638 / PS) ( <i>Dechlorosoma suillum</i> ) | N |
| G8QR99 | SpiGrapes_0926     | <i>Sphaerochaeta pleomorpha</i> (strain ATCC BAA-1885 / DSM 22778 / Grapes)                  | N |
| G9X349 | HMPREF9629_00806   | <i>Peptostreptococcaceae</i> bacterium ACC19a                                                | N |
| G9XC84 | HMPREF9628_00292   | <i>Peptostreptococcaceae</i> bacterium CM5                                                   | N |
| H1G8Q6 | HMPREF0557_00376   | <i>Listeria innocua</i> ATCC 33091                                                           | N |
| H1G8Q7 | HMPREF0557_00377   | <i>Listeria innocua</i> ATCC 33091                                                           | N |

|        |                         |                                                                                                                                       |   |
|--------|-------------------------|---------------------------------------------------------------------------------------------------------------------------------------|---|
| H1LGS0 | HMPREF9104_01798        | <i>Lactobacillus kisonensis</i> F0435                                                                                                 | N |
| H1WNM7 | LEUCOC10_01345          | <i>Leuconostoc citreum</i> LBAE C10                                                                                                   | N |
| H2J665 | Marpi_0688              | <i>Marinitoga piezophila</i> (strain DSM 14283 / JCM 11233 / KA3)                                                                     | N |
| H5UVE1 | MOPEL_132_00660         | <i>Mobilicoccus pelagius</i> NBRC 104925                                                                                              | N |
| H6CGY3 | WG8_1543                | <i>Paenibacillus</i> sp. Aloe-11                                                                                                      | N |
| H6NB78 | PM3016_5343             | <i>Paenibacillus mucilaginosus</i> 3016                                                                                               | N |
| H7F339 | KKC_02784               | <i>Listeria fleischmannii</i> subsp. coloradonensis                                                                                   | N |
| H7F340 | KKC_02789               | <i>Listeria fleischmannii</i> subsp. coloradonensis                                                                                   | N |
| H8FVX9 | PHAMO_40078             | <i>Phaeospirillum molischianum</i> DSM 120                                                                                            | N |
| H8N0H1 | pleD3 COCOR_04267       | <i>Corallocooccus coralloides</i> (strain ATCC 25202 / DSM 2259 / NBRC 100086 / M2) ( <i>Myxococcus coralloides</i> )                 | N |
| H9UHF0 | Spiaf_0851              | <i>Spirochaeta africana</i> (strain ATCC 700263 / DSM 8902 / Z-7692)                                                                  | N |
| I0BPW9 | B2K_27610               | <i>Paenibacillus mucilaginosus</i> K02                                                                                                | N |
| I0IKW4 | LFE_0186                | <i>Leptospirillum ferrooxidans</i> (strain C2-3)                                                                                      | N |
| I0IQK6 | LFE_1877                | <i>Leptospirillum ferrooxidans</i> (strain C2-3)                                                                                      | N |
| I0JPE6 | HBHAL_3671              | <i>Halobacillus halophilus</i> (strain ATCC 35676 / DSM 2266 / JCM 20832 / NBRC 102448/ NCIMB 2269) ( <i>Sporosarcina halophila</i> ) | N |
| I0X6Y9 | MSI_21000               | <i>Treponema</i> sp. JC4                                                                                                              | N |
| I0X855 | MSI_16880               | <i>Treponema</i> sp. JC4                                                                                                              | N |
| I0XA21 | MSI_9180                | <i>Treponema</i> sp. JC4                                                                                                              | N |
| I1B2E0 | C357_01298              | <i>Citricella</i> sp. 357                                                                                                             | N |
| Q03VX4 | LEUM_1556               | <i>Leuconostoc mesenteroides</i> subsp. <i>mesenteroides</i> (strain ATCC 8293 / NCDO 523)                                            | N |
| Q04DU8 | OEOE_1517               | <i>Oenococcus oeni</i> (strain ATCC BAA-331 / PSU-1)                                                                                  | N |
| Q08T21 | STAU_4235<br>STIAU_6437 | <i>Stigmatella aurantiaca</i> (strain DW4/3-1)                                                                                        | N |
| Q18BU0 | CD630_14190             | <i>Peptoclostridium difficile</i> (strain 630) ( <i>Clostridium difficile</i> )                                                       | N |
| Q1D603 | MXAN_3735               | <i>Myxococcus xanthus</i> (strain DK 1622)                                                                                            | N |
| Q1JW04 | Dace_0162               | <i>Desulfuromonas acetoxidans</i> DSM 684                                                                                             | N |
| Q1WTG6 | LSL_1024                | <i>Lactobacillus salivarius</i> (strain UCC118)                                                                                       | N |
| Q221T2 | Rfer_0469               | <i>Rhodoferrax ferrireducens</i> (strain ATCC BAA-621 / DSM 15236 / T118) ( <i>Albidiferrax ferrireducens</i> )                       | N |
| Q2B6K1 | B14911_06261            | <i>Bacillus</i> sp. NRRL B-14911                                                                                                      | N |
| Q2RLY1 | Moth_0223               | <i>Moorella thermoacetica</i> (strain ATCC 39073)                                                                                     | N |
| Q2VZS3 | amb4098                 | <i>Magnetospirillum magneticum</i> (strain AMB-1 / ATCC 700264)                                                                       | N |
| Q3MFD3 | Ava_0679                | <i>Anabaena variabilis</i> (strain ATCC 29413 / PCC 7937)                                                                             | N |
| Q5FJ86 | LBA1413                 | <i>Lactobacillus acidophilus</i> (strain ATCC 700396 / NCK56 / N2 / NCFM)                                                             | N |
| Q6ALR6 | DP1980                  | <i>Desulfotalea psychrophila</i> (strain LSv54 / DSM 12343)                                                                           | N |
| Q7CZY1 | Atu1119                 | <i>Agrobacterium fabrum</i> (strain C58 / ATCC 33970) ( <i>Agrobacterium tumefaciens</i> (strain C58))                                | N |
| Q8Y5Z1 | Imo1912                 | <i>Listeria monocytogenes</i> serovar 1/2a (strain ATCC BAA-679 / EGD-e)                                                              | N |
| Q8Y5Z2 | Imo1911                 | <i>Listeria monocytogenes</i> serovar 1/2a (strain ATCC BAA-679 / EGD-e)                                                              | N |
| Q8YMN7 | all4896                 | <i>Nostoc</i> sp. (strain PCC 7120 / UTEX 2576)                                                                                       | N |
| Q8YPG9 | all4225                 | <i>Nostoc</i> sp. (strain PCC 7120 / UTEX 2576)                                                                                       | N |



|        |             |                                                                                             |   |
|--------|-------------|---------------------------------------------------------------------------------------------|---|
| Q92A96 | lin2026     | <i>Listeria innocua</i> serovar 6a (strain CLIP 11262)                                      | N |
| Q92A97 | lin2025     | <i>Listeria innocua</i> serovar 6a (strain CLIP 11262)                                      | N |
| Q9K8H0 | BH3036      | <i>Bacillus halodurans</i> (strain ATCC BAA-125 / DSM 18197 / FERM 7344 / JCM 9153 / C-125) | N |
| A0YP32 | L8106_11277 | <i>Lyngbya</i> sp. (strain PCC 8106) ( <i>Lyngbya aestuarii</i> (strain CCY9616))           | E |
| A5CYJ5 | PTH_2757    | <i>Pelotomaculum thermopropionicum</i> (strain DSM 13744 / JCM 10971 / SI)                  | E |
| D8IYM5 | Hsero_2714  | <i>Herbaspirillum seropedicae</i> (strain SmR1)                                             | E |
| Q2BMC3 | MED92_12931 | <i>Neptuniibacter caesariensis</i>                                                          | E |

**Table S2. List of genes tested for Hypr activity.** Genes codon-optimized for *Escherichia coli* K12 strains have an asterisk next to the gene. All codon-optimized genes were ordered from IDT.

| Gene     | UniProt ID | Nucleotide Sequence(5'→3')                                                                                                                                                                                                                                                                                                                                                                                                                                                                                                                                                                                                                                                                                                                                                                                                                                                                                                                                                                                                                                                                                                                                                                                                                                                                                                                                                                                                                                                                                                                |
|----------|------------|-------------------------------------------------------------------------------------------------------------------------------------------------------------------------------------------------------------------------------------------------------------------------------------------------------------------------------------------------------------------------------------------------------------------------------------------------------------------------------------------------------------------------------------------------------------------------------------------------------------------------------------------------------------------------------------------------------------------------------------------------------------------------------------------------------------------------------------------------------------------------------------------------------------------------------------------------------------------------------------------------------------------------------------------------------------------------------------------------------------------------------------------------------------------------------------------------------------------------------------------------------------------------------------------------------------------------------------------------------------------------------------------------------------------------------------------------------------------------------------------------------------------------------------------|
| GSU1658  | Q74CL4     | <p>ATGGAACGGATTCTCGTTGTCGAAGATGACCGTTTTTTTTTCGTCAGATGTATGTTGATCTCCTGAAAGAGGAGGG<br/> ATACGAGGTCGATACCGTGGCATCGGGCACCGAGGGTTGAAGCGGCTTGAGAAGCAAGAATACCACCTCGT<br/> CATTACCGACCTGGTCATGCCCGGAATGAGCGGTATCGAGGTGTTGTCGCCGCTCAAGCAGAAAGCTCCGAA<br/> CGTCGATGTCATCCTCGTACCAGGTCACGCCAACCTCGAATCGGCCGCTATGCCCTCAAGAATGGTGCCCGC<br/> GATTATATTCTCAAACCGTTCAACCATGATGAATTCAGGCACACCGTGGCACTTTGCTTTGAGCAGCGGAGGCT<br/> TATCAACGAAAACACGAGCTCAAGGAGCTGCTGAATCTTTTTCAAGTTGGGCAGAACATAGCCAACTGTATCG<br/> ACTTGGAAACGGCTCTCTGCGGTTGTGGTCGATGCTTTCTGCAAGGAGGTCGGAGTTTACGCGCTATCGGCCT<br/> CTTTCCCGAAAAGAGCGAACCCACGCCCTCAAGGAGCTGAGGGGGCTTAGCCTGAAGTTGCAGCCGCTCT<br/> TGCCGAAAAGCTCTTACCCTTTGCAGTGACGCCGCGGAGACGGCAGGGGGCTTTGACGCGCTCGACGGTTC<br/> CCATTTTTCCGATGGTCTCCTGCGAACTGCGGGGATTAATGGCGCCCTTGTTGTTAGCATCCGCCAGCGTACG<br/> CTCCTGCAGGGAGTGCTTCTGCTGGTCAATGACCAGGGCAAGCCGTTCCCTGCCGTGTTCAAACATAAAAGCA<br/> TCCAGTTTTGCTGGAGCAGGCATCGTTGCCTTCGACAACGCCCTGCGTTACTCCAGCGCCCGCGACATGCT<br/> CTATGTTGACGAACTCACGGGACTCTTCAACTACCGTTACCTTGACATCTCGCTGGACCAGGAGTTGAAGCGG<br/> GCTGACCGATTCCGGCTCGGTAGTTTCCATGATCTTCATCGACATGGACCACTTCAAGGGAGTCAACGACACCC<br/> ACGGCCATCTTTTTGGGAGCCAGGTCCTCCATGAAGTAGGTCATTGCTCAAGAAGTCGGTCCGTGAGGTCGA<br/> TGTAATCATTCGCTACGGTGGCGAGGATTCACCATTAATTCTGGTGGAAACCGGTGAAAAGGGCGCTGCAACC<br/> GTGGCTGAAAAGGATTGTCGCTCCATCGAGGACCACTTCTGGCCTCTGAAGGGCTCGATGTCGGGCTCA<br/> CCGCAAGTCTCGGCTACGCCTGTTATCCCTTGACACCCAGTCCAAAATGGAACCTCTGAACTGGCGGACAA<br/> AGCCATGTATAGGGGCAAGGAAGAGGGGCAAAAACCGTGTATTCCGGGCAACGGCAATCCGTTGA</p> |
| Mxan2643 | Q1D911     | <p>ATGAATCCCGCGGACCTCCTGTCGGCCATGAAGCGGACAGTGGAGCAGTTGGCCGCTTCAATGAGATGGCG<br/> AAGGCCCTGACGTCCACGCTCGAGCTCCGCGAGGTGCTGGCGCTGGTGATGCAGAAGGTCAGCAGCCTGCT<br/> GCTGCCTCGCAACTGGTCGCTCATCCTCCAGGACGAGCGCACCGGAAAGCTCTACTTCAAATCGCGGTGGG<br/> TGACGGCGCGGACGTGCTCAAGGGCTCCAGCTCAACCCGGCGGAGGGCATTGCCGGCCGCTTCCACGT<br/> CCGGCGCGGCGCGCTCGTCCATGACGTGGGTGGGGACCCAGCTTCTCGCCAGCTTCGATGAAGCCTCC<br/> GCCTTCCACACCCGCTCCATCCTCGCGGTGCCGCTGCTGGCCCGGGGCGGGTCTGGGCATCATCGAACT<br/> GGTGAACGGGCCCATGGACCCCCCTTCAACCAAGAGGACCTCACCATCTCACCGCCATCGCGGACATACCG<br/> GGCCATCGCGATTGAGAACGCGCGCAACTCCGGCGGGTGCAAGGAGTTGACGATTACGACGAGCACACCG<br/> GCTGCTAACACGCCCGGCACCTGCGCGCTTGTGGACCAGGAGGTGAAGCGCTCGGAGCGCTTCAGCCAC<br/> CCGCTGTCGCTCGTCTTCCCTGGACCTGACCACTTCAAGAGCATCAACGACACCCATGGGCACCTGGTGGT<br/> AGCGCCACCTTGAAGGAAGTGGGGACCTGCTGATGACCTGGGCGGCGAGAACCTGGAGCCGCTTCCG<br/> CTACGGCGGGGACGAGTTGCGCATGTTGCTGGTGGAGACGGACCCGGAGGGCGGGCGTTCATCGGGCAGC<br/> GCGTCTCGGAGCGCTTTCGGGGGCGGGGTTCTCTGAGCAGGGCTGAGCTGCGCCTCACCGCCAGC<br/> GTGGCGTGGCCACCTACCCGGACCATGCCTGCTCCGCGCTGGACCTCATCCGCGCGGACCTTCGCCAT<br/> GTACGCGGCCAAGGCCCGGGCCGGACGCGCTGTCATCGCCGAGCCATTGCTCCGACGCGGGCAGCACA<br/> GGCTCCACGAGTCCCGGAGCGGTAG</p>                                                                                                                                                                                                                                                                                                                                   |
| Mxan4463 | Q1D3Y9     | <p>ATGGCGGAATCCTCCTCGTCGACGACGAAAAGATCGCCCGCACCTGTACGGCGACTACCTACCGCCGTG<br/> GGACACGCCGTCACGGCGGTGGGCACGCTACAAGAGGCAAAAGGAAGCACTCGCAGGCGACCGTTTCGACGC<br/> GGTGGTGACGGACCTATCCTCCCGGTGGTGACGGCATGGAGGTCTGCGGCACGTGCGGGAACATCACCC<br/> CGGGCGTGGAGGTGGTGGTCATCACTGGCCTGGAGAAGGTGGACCCCGCCGTGCGCGCCATCAAGAGCGGC<br/> GCCGCGGAGTACCTCGTCAAGCCGGTGGCCCGGAGGCCCTGACGACGCCGTGCGCCGAGCGCTCACAC<br/> GCGCGACCTGATGCAGGAGAACGCGTCTGCTGCGCCGCCATGTGGCCATGTTGGAGGCGGGGCAACGCATCG<br/> CCACCACCTGGACCGGAGAAGCTGGCCTCGGCCACCGCCAGCGCGCTGCAGAGCATGGCCTCCGCCAGC<br/> CCGTGGTCTGCTGGAGCGGACTCTGCCTTCGCGCTGCGCGGCCACGGCACCGCCGCTGTCCACCGC<br/> GCTGGAAGAGCGGCTATCGCCGAGCTCATCGAACGCTGACGAACGAACGCGGTCCGCGCGAGCTGGACG<br/> GCATGGAGCGGCCCTTCTCGCGCAATCTCCTTCCCGCGCTGGAGGGTGACGCCGTGCTGGGACACGCG<br/> GTGCTCTTCTCGCGGCACGGGCGCGGAGTGGGCGGGCGAGACGGCCAGCTTCTGTTTCGCAACTGGG<br/> GCTCGCGCTGCGCAACCTCGGCCGCTTCCGCCGCGTGGAGGACCTGGCGTACGTGACGACCTCACGCGCC<br/> TGTTCAACACCCGCTACCTGCACCTGGTGGTGGACCGCGAGGTCCAGGACGCGCTCCAGTCAAGCGCACCT<br/> TCAGCCTGCTGTTCTGGACCTGGACCACTTCAAGTCCATCAACGATACCCATGGCCACCTCGTGGGCTCCAA<br/> GGTGTGGTGGAGGCGGCGCGTGGTGAAGGGCTGCGTGAGAGACCACGACGTGCTGCGCGCTACGGC<br/> GGAGACGAATACGTGGTGGTGTGCGCAACACCGACTCCGGCGGCGGCTCAAGTGGCGGAGCGCATCCG<br/> ACGACCATGGAGACGCACAACCTTCTGGCGCGGAAGGCTGTCGCTCAAGCTCACACGTTGATCGGCGT<br/> GGCCAGCTTCCCGAGCAGCCAGGACAAGGCCAGCTGTTGGACCTGTCGGACCGGGCCATGTACCGCG<br/> GCAAGCGGGGCTCGCGGAACGTCTACATGGCGGCAAGGACCTGGAGGCCACCGGCCGAGCGGCC<br/> GCAGGCCCACTCCGCGTCTGA</p>                                  |

|                        |        |                                                                                                                                                                                                                                                                                                                                                                                                                                                                                                                                                                                                                                                                                                                                                                                                                                                                                                                                                                                                                                                                                                                                                                                                                                                                                                                                                                                                                                                                                                                                                            |
|------------------------|--------|------------------------------------------------------------------------------------------------------------------------------------------------------------------------------------------------------------------------------------------------------------------------------------------------------------------------------------------------------------------------------------------------------------------------------------------------------------------------------------------------------------------------------------------------------------------------------------------------------------------------------------------------------------------------------------------------------------------------------------------------------------------------------------------------------------------------------------------------------------------------------------------------------------------------------------------------------------------------------------------------------------------------------------------------------------------------------------------------------------------------------------------------------------------------------------------------------------------------------------------------------------------------------------------------------------------------------------------------------------------------------------------------------------------------------------------------------------------------------------------------------------------------------------------------------------|
| Ddes1475               | B9J0V0 | <p>ATGCTGAACAAGTCAAGCATCATACCAGAACATATACAGCTCGAATCACACGACCCCTGTCTGGGAGTGGCACA<br/> CGACATCCGACAGGCTTTTCATGAGCGTAGGCGCCCTTGCCAGCTACGCATGGACGGCAAACCGCCGCGCA<br/> GCATGAAAGATTATCTGGAGCACTGCCCCCTCGAAAGCCTGGCTCCCCTTCTTGAATCTATGGAAAAAGCGCT<br/> CAACGGCTCCCACGGCCGACCTTGAAGTGTTCCTTTGACAGTTTTCTGGTACGGTCTCAGATACTGG<br/> TCTTGGCGGCGACGTTTTGGTTCGGGAACCCCTGGTAAACAGGCTGCAACGTGGCTATGGACAGACAAAGGG<br/> TTGCACCCACTGCTGCCGCGCCCGCTGCCGGCACCCCAAGCCCGCCCGAAGCCTGTATGCCGGAAGCGCC<br/> GTTCTTCCACGGCCGCGAGCGACGCCAGCCGCTCATGCTGGCCCTAACGCCGCAAGCGATGGCCTGTG<br/> GGACTGGGACCCAGCAACATGCCATTTATTCAGTCCCGCTACCTCGACATGCTGGCTACACCAGCGAA<br/> GAATCCCCCCCCGTCCACATCATGGACCAGCAAGGTACACCCCGACGATTACGACAACATCGTTCCTCATGC<br/> AGATTGAATTCATCAACAACCCAAAATGGGCGACAGCTTGAATGCACCTACCGGATGCAGCGCGCGACGG<br/> CACCTGGGCATGGATTCTCAGCCGGGGCTATGTGACTCACCGCGACGCAAGCGGCAAGGCCATCCGCGTTG<br/> GGCCCTGCACACAGACGTCAGCGCGAGCCAGGGCGACAGGGCACGGCTTGAAGAGCTGGTGCCTAACGACG<br/> CCCTTACCGGGCTGCGCAGCCGACCTATTATGGAATGACTGTCGACAAGCTGGAACAGCAGCAGATGCGGC<br/> CCGTGACGATCATCATCGCCGACATGGACGGACTCAAATGGTCAACGACCATGTAGGCCATACCGAAGGCAG<br/> CGAAATGCTCTGCCAGGACCCATCACTAGCGGGCAGTCTCAATGCCACCACTGATGCCCGCATGCGG<br/> CGCGATGAATTTGCCGCCATTGTGCCGGTTGCCCAAGGAAGACCTTGAAGCGCTCATCCAGCGGGTCCAG<br/> AGACGCTTTTGTATGCCTATAATGCCGACCCGGACCATGTGCCGACACACATGTCTGTGGCGGACGATGCGCT<br/> GACGACATGAACACCACCCTGGCCAGGCCCTGTGCCGAGCGGATCGCAACATGTGGCCGCTAAGCAGCAA<br/> AGCAGCCAAAGTGGCGCTGCGCATAAAAACTGGATGAAAAACCGGACCGGCAAAACAATTCAGCTTGAAG<br/> ACAGCCGCTACAGGATGTCCCCACGCACGACTCTTGA</p> |
| Bd0367 WT *            | Q6MQU2 | <p>ATGTCGCGCGCCGAAGTGACGCTCGTATGTAAAATGAGCTTTGAAGTATCGCCGAAGCAACCAAGAGCGCC<br/> GTATCCTGGTTATCGACGACGATAAAGACTCATTAGAATTTTATTGAAACCCCTGCGTGGGAAGGTTATGAC<br/> GCGCGTGGCGTACTACCGAAGCGGAGGCGCATAAATTAATCGAGTCATGGATTCCGCATATCGTGATCCTGG<br/> ATTGGATGCCCCGTAATGGCCGGCTGCGCGTTCTGAAATCCGTACGCGAAGCCGCTGATCATGCTCTCGT<br/> GTGCTTTGTATCGGAAATTTCCACAGAGGCTATTATTGAGGCTTTGGATTCCGGCGGACGATTATTT<br/> GTAAGGCCATTCGTGCCATTAGAGTTGTTAGCACGATCCGCTCTCAACTGCGCATCCGCGATCTGCACGAGC<br/> AGCTGCTGTTGCCAACGAAAAATTAAGGAACCTGGTTGATACCGACGATTAACCGGTTTATATAATATCGGTA<br/> GCTTATACCAGCGTCTGGATTTGAAATGGAACGTGGCCGCGCTCCACCGCAGCGTGTGCTGGTGCATGAT<br/> GGACATGGACTATTTCAAACCGTGAATGATGGACACGACCACTTATTCGGGAGTTATGTGCTGACGCGAAGTT<br/> GGTAAAATCATTGCGGCCAACACTCGTAACATCGATATCCCGGCAGTTATGGGGGGATGAGTTTCTGATGG<br/> TCCTGACCGAACTAATCATGCGGGCGCTATGATTTTTGCGAGCGCCTGCGGAAAAATTTGAAAAACAACC<br/> TTTCGTAAACGGCGAGGACAGCATGAAATGACAGCCCTACTGGGCTTTGCGATCACCATCCCGGCGAAAAACA<br/> TCAGCGCGCGTGAAGTGGTTGCGCCGCGCCGACCCAGCTCTGTATCAGGCAAAACGCGCCGGCGCAACCCAG<br/> GTGGCGCATTACAAACCGGAGAGCGCGCCCGTAGTTGAGATCAAGTCGGCAGTGCAACAACGCCGTAAGGCC<br/> CGCGTTAA</p>                                                                                                                                                                                                                                                                                                                                                                                                                  |
| CabtherA_10<br>65 WT * | G2LH77 | <p>ATGAACCTTAAACTGGGCGCATCTTACGTCGGTTAATAGCCTCAACCAAAACAGAAACTGCAAGCCAACCC<br/> ACTTGCCCGCCGCGTCAAGCGCGTCCGGCACTGGTGCACATGCGTGGAGATTATCTGGGCTCAAGCTTTCCG<br/> TATTTGAACATGCCATTACGCGCATTGGACGCGGATCAGACGCGAGTTACGTTTGAAGAAATGATGACGAAGCA<br/> AGTCGCTTACACGCGGATTTGAGCGCTTGGAAACACCTACAGGGCATTTCGAATATTGGTTGACCGATCTCC<br/> GCTCTACCAACGGGACCCAACTGAATGGTATTCCGCTGGTGCAGGGCGAGGCGAGTGTGCTGCATGATGGCG<br/> ATAAATTTAGTATCGGCGCATATCCTCAAGTTCACTTTTTAGACGATATTGATGAGGAGTTTATCGTGCATG<br/> TACCCGAACCTCATCACTCATGACTTAAACCGTCTGCTGAACCGCAAAATCGCTTGGAAATGACGCGT<br/> GAGATGGCCCGTAGTAACCGCTACGGTCAACCAATTTGGCCTGCTGATGATGGATATTGATCATTTTAAAGCGT<br/> CAATGATACCTATGGTCACTGGTTGGTTCTCAGGATTACCGGAGGTGGCTACCGTTATCCGCGAAACACTG<br/> CGTACTCTGACATTGCAGGTGTTATGGTGGAGAAGAATATATTGCCCTTACCAGAAACCGGATCCGCGTGC<br/> GCGCACACGAAAGCGGCCGAGCGCATTGTCGAAGCAATCGAACCGCACCCGTTACAGCAAGCCTCAACGTGC<br/> CGCACCAAGTTACGCTGACCATTAGTATTGGGATCGCGAGTTATCCGGGGGACGCGACCCAAATTAATGA<br/> TCTGATCCAGCGCGGATGAAGCGATGATGAAGCAAAACGCGCGGTGCTAAATCTGGTGCAGACGCGGG<br/> CCAATCGGCGGCAATCGCGCGACCCCGCTTCACTTCCATTGCCGCGCGCTGGAGATGACAGTCCCAC<br/> GGAGCATCTGACCGTGGAGCAGCCGAGCCTGTCAAACCTAG</p>                                                                                                                                                                                                                                                                                                                                                                                     |
| DEFDS_068<br>9 R248A * | D3PC46 | <p>ATGTATGAAAGCCTGAAACGCAACATCTTCGTCATTCTGACAAGCATTCTCCTATTTATGAAACCTATAACAAA<br/> ACAAATGAGAATTTGCTGCTGCTGACTTTTACTGCTCACGTGCTATATTGCTCAACGTTGATCAAAAAGGTT<br/> GAACTGGATGAAGTACTGTTTGTCTGTTGCTGATTTAATCGGTTATCTGAGCATCGCAAACCGTGAGTTTCATT<br/> TATTTTCAAATTTCTCGGATTAACATTTTGGTATTTGATTGCAAGTTCTACGTGATTAAGGATGATCCTGGCGATT<br/> TGTTGATCTCTCGATTTATTCTACTTGAACATTTGATCCTTTCCAGTTTACGCTGATGATTTCTATTCTT<br/> ATTCTTTTCTATCTTCATCAAATTTGCTGATTGATCGTTTGGAAAGAAGAAATCGACGAACTGTCCATTACGGACGA<br/> CCTCACGGGTCTGCTGAACCAAAAAGGATTCTGAAAAAGTTGAGGAAGAATATTATCGTAGCGTTTCGCTACA<br/> AGAAAAATTTTACCGTTATCATGTTGGATAGCGATGATCTGAAGAAAGTTAATGACACTTATGGCCACAAATACG<br/> GGACCAAAGTTATTCTGTTTCATCGCGGATGAAATTAAGAAGAATTCGCGCTACCGACTTTGCTTGGCGCTAC<br/> GGCGGTGACGAGTTTATGATCTGCTGTTGAAACACCTATCAACAACCGCAAAATTTTCCGCGAAAGCGCTGA<br/> AAAAACAATGCAATGAAACCGGATTTTACCGATAAAGCCGTTGGTTTCAATGTGACAGTGTGCGTGGGGTT<br/> GTTGTTTATCCGCAACAAAGCGAAAAAGTCTGCGAGCTGTTGATCTGGTTGACAAAGCGCTGTACGAAAGCAA<br/> AAAAACAAGGCAAAATCGCGTTGAGATCTGACCAAAATTTCTTCTTA</p>                                                                                                                                                                                                                                                                                                                                                                                                                                                                                                             |
| Calni_1629<br>R268A *  | E4TFG3 | <p>ATGATTGATAACAAGATTAACACTTTCAGTATAAGATTGCAGAAGTCTTATATCTCTTTCGCTTACTATCATCA<br/> TCGCCTCCATTAATTTCTGATTCTACCAGTAACAAAGCAAACTACGCGATCTTATGTTTTCCTGATCTTCAT<br/> CATCCTGAAATTTAGCATTGACGATAATCTGTTGAGCTCAAAAATCTGTCTTATTATCTGTTTCCAGTACAA<br/> AAACATTTTTCGCGGTTCAATTAACGGGTCAACTCAAATCTGTTAATCTTTATGTCGATGCTGGGCTTGCTGAT<br/> TTTTAGCATTGTGCTGTATGATAAAAAATCTCTCGTCCACTTTATTGTGACCGGATCTTCTGCTGCTGTTTT<br/> TTCACAACTTTGATTGAAAGAGAGTTTTGTGTTCTTCACTCTCACTTCTTCTTATTTTATTTTCTGTTAAACT<br/> TAATAAGATCTACATTACTACCGTAACCTGATCACCGAGTTATCTATTACTGATGAGATGACCGGCTCCTCAA<br/> CCAGAGCGGGTTTATGAAGAAGATCGAAGAAGAATTTATCGCAGCCAGCGTTACCGAAGAAACGTTTTCAGTT<br/> TGATGATCGATTACAGCAATTTAAACTGATTAATGATACTTATGGCCATAAATATGGGACATCTGCTCAAGT<br/> CCATTGCGGAAGTCAATTAAGACTAACATTCGCGGTACAGACTTCCGCGCGCGCTATGGCGGAGATGAATTCAT<br/> TCTGTGCCTGGTGGAAACTGATTTAGACCGGGCTCTGGAAGTGGCAGAGGCGATCCGTAAGCAGTTTCGAGCT</p>                                                                                                                                                                                                                                                                                                                                                                                                                                                                                                                                                                                                                                                      |

|                  |        |                                                                                                                                                                                                                                                                                                                                                                                                                                                                                                                                                                                                                                                                                                                                                                                                                                                                                                                                                                                                                                                                                                                                                                                |
|------------------|--------|--------------------------------------------------------------------------------------------------------------------------------------------------------------------------------------------------------------------------------------------------------------------------------------------------------------------------------------------------------------------------------------------------------------------------------------------------------------------------------------------------------------------------------------------------------------------------------------------------------------------------------------------------------------------------------------------------------------------------------------------------------------------------------------------------------------------------------------------------------------------------------------------------------------------------------------------------------------------------------------------------------------------------------------------------------------------------------------------------------------------------------------------------------------------------------|
|                  |        | GAAAAGCTTCTTTACCAAGATGAGAAGAAGTTCAACAATCACGATTAGTATCGGAGTAAGCAACTATCCTAAAA<br>GCGGCGATTCTCTGATGGATGTGATTGAACCTGCGGACAAGGCCATGTACCATAGCAAGAACAGCGGTAAGAA<br>CAAGACGAGTTTCTGCTGAAGAAC                                                                                                                                                                                                                                                                                                                                                                                                                                                                                                                                                                                                                                                                                                                                                                                                                                                                                                                                                                                            |
| ACP_2467<br>WT * | C1F1G0 | ATGGACGCCACACTATCGTCAGTCTGCCGCCACTTGAACCAAGGGATGTCTGCCGAAGCGCGCAATCAG<br>AACTGGAAGGATTTGGTGGTCTTCATAACTTAGCACGCGCTCTGACCTCCTCCCTGGAGCTTGATTGCGGTGC<br>TGCATGCAATCATGGAACAGATGCGTCAATTTCTCGAACCGGAGACCTGGTGGTTCCTTATCCTGGATGAACA<br>ACCCAGGAATTGTATTACGCGGTTGCACTCGGACAGTCCGAAGCGGCTCTGCGTAATGTGCGTGTGCCGCTG<br>GGAGAAGGCATGGCGGGTTGGGTGGCCCAACATGGCGAGTCCCTCATCGTGCCGGATCTGGAACAAGATCC<br>GCGCTTCGCCGCGACCTCGGATGCCCGCACCCCAATGCGTAGCGCATCTGCATGCCACTGCTCTCACGCCA<br>ACGCACCCTGGGCGTGATCAACTGTTAACTGCCGCTGGAAGCATGACCGAATACACCATTAGCTTCTCTG<br>CATATCCTGTGCGACTATGCGGCGATTGCAATCGAAAATGCACGTGCAGTGGAGAAAATCCAGGCCCTGACGA<br>TTACGGATGACTGTACCGGCTTATACAACCAACGTCACTCCAGCAGAAGATCGAAGAAGAGGTCACCCGTC<br>TCGTGTCACCACCATCCATTCTCAGTCATCTTTCTGGATCTTGACCATTTCAAACAAATCAATGACCAACACGG<br>GCACTTAATCGGGAGCCGCTTCTGGCGGGTATTGGCCAGTGCCTCCGCTGCACATTGCCCGGGAGACCA<br>TGCCTTCGCTATGGTGGCGATGAATTTATCTTACTGCTTCCAGAAACCACAAAAGCGGAAGCCGAGCAGATTG<br>CGCGCAACCTGCGTCAAAAAGTGCCTAGCCATGTCTTCGAGATGGGCAGCGATCTCCGTTTGCAGGTTTCGGC<br>CTATTCGCTGTCGCCAGTTTTCCGGAGGATGGCCGTACGGGCCATCAGATCATTGATGGCCGATGCAATG<br>ATGATTTGGTAAAGGCTCTACGCGCGACGACGTGCGAGTTGCGGACCGTAATACCGAACTGCTCCGCACT<br>CA |

**Table S3. List of primer sequences.** Restriction sites are denoted by an underline.

| #  | Nucleotide Sequence (5'→3')                              | Purpose                                                |
|----|----------------------------------------------------------|--------------------------------------------------------|
| 1  | GAG AGA CAT ATG GAT TTC ACA AAA ATC TCC G                | For Primer for GSU0474 into pCOLA                      |
| 2  | GAG AGA CTC GAG TTA CGC TGT AAC GCG GCA G                | Rev Primer for GSU0474 into pCOLA                      |
| 3  | GAG AGA CAT ATG CCC TTG CGC AAG AA                       | For Primer for GSU0537 into pCOLA                      |
| 4  | GAG AGA CTC GAG TTA CGG TTG AAG TGA CCT GAG C            | Rev Primer for GSU0537 into pCOLA                      |
| 5  | GAG AGA CAT ATG TCC GGC GAC ATT CTG                      | For Primer for GSU0542 into pCOLA                      |
| 6  | GAG AGA CTC GAG CTA TTT CAC GAC AAC CTT GTT CTT<br>G     | Rev Primer for GSU0542 into pCOLA                      |
| 7  | GAG AGA CAT ATG TCC AGG AAC CAC CTG C                    | For Primer for GSU0808 into pCOLA                      |
| 8  | GAG AGA AGA TCT CTA ACG GGA AAC GGT GTT GC               | Rev Primer for GSU0808 into pCOLA                      |
| 9  | GAG AGA CAT ATG CCC CAT GTG AAC CTG                      | For Primer for GSU0895 into pCOLA                      |
| 10 | GAG AGA CTC GAG TCA TGG CAG GTT GAG CG                   | Rev Primer for GSU0895 into pCOLA                      |
| 11 | GAG AGA CAT ATG AAG ATT CGG AGC ACC CT                   | For Primer for GSU0946 into pCOLA                      |
| 12 | GAG AGA CTC GAG CTA CCC CTC TTC GGC CCT                  | Rev Primer for GSU0946 into pCOLA                      |
| 13 | GAG AGA CAT ATG TCG GCA GAA AAA GAA CAG AC               | For Primer for GSU0952 into pCOLA                      |
| 14 | GAG AGA CTC GAG CTA ACC TTT GAC GGC CTC CAG              | Rev Primer for GSU0952 into pCOLA                      |
| 15 | GAG AGA CAT ATG GGC AGG GAG GGC                          | For Primer for GSU1037 into pCOLA                      |
| 16 | GAG AGA CTC GAG TCA CCT TCC CCG CGC                      | Rev Primer for GSU1037 into pCOLA                      |
| 17 | GAG AGA CAT ATG AAG CCT GAC ACC ACC TTC                  | For Primer for GSU1400 into pCOLA                      |
| 18 | GAG AGA CTC GAG CTA TGC GCA GGT GAC GC                   | Rev Primer for GSU1400 into pCOLA                      |
| 19 | GAG AGA CAT ATG CCG CGA AAG AAG AAA AC                   | For Primer for GSU1554 into pCOLA                      |
| 20 | GAG AGA CTC GAG TCA GAC GTC GGC GCG                      | Rev Primer for GSU1554 into pCOLA                      |
| 21 | GAG AGA CAT ATG ACG GAT GAA CAG AGA CAA TG               | For Primer for GSU1643 into pCOLA                      |
| 22 | GAG AGA AGA TCT TCA GAG TTG TTC GCT GCA CAC              | Rev Primer for GSU1643 into pCOLA                      |
| 23 | GAG AGA CAT ATG CCC CCT CCG CTT C                        | For Primer for GSU1656 into pCOLA, pET16b              |
| 24 | GAG AGA CTC GAG TTA TGC AGG TAA TAC GCA GCA TTT<br>TTT A | Rev Primer for GSU1656 into pCOLA, pET16b, pET-<br>MBP |
| 25 | GAG AGA CAT ATG GAA CGG ATT CTC GTT GTC                  | For Primer for GSU1658 into pCOLA, pET24a              |

|    |                                                 |                                         |
|----|-------------------------------------------------|-----------------------------------------|
| 26 | GAG AGA CTC GAG TCA ACG GAT TGC CGT TGC         | Rev Primer for GSU1658 into pCOLA       |
| 27 | GAG AGA CAT ATG ACA GAT GCC ATT ACG GAT G       | For Primer for GSU1671 into pCOLA       |
| 28 | GAG AGA CTC GAG TCA ATG AAG CTG GAC TCC CTT G   | Rev Primer for GSU1671 into pCOLA       |
| 29 | GAG AGA CAT ATG GAA CTC AGC CCC GAG             | For Primer for GSU1870 into pCOLA       |
| 30 | GAG AGA CTC GAG TCA TGG CTC ATC CTC TCT TCT G   | Rev Primer for GSU1870 into pCOLA       |
| 31 | GAG AGA CAT ATG CGA AAA GAG GGC AAG G           | For Primer for GSU1927 into pCOLA       |
| 32 | GAG AGA AGA TCT CTA GCG CGA CCG AGC G           | Rev Primer for GSU1927 into pCOLA       |
| 33 | GAG AGA CAT ATGACCCTCGCCGAAG                    | For Primer for GSU1937 into pCOLA       |
| 34 | GAG AGA CTC GAG TCAGGGGTGCATTGACAG              | Rev Primer for GSU1937 into pCOLA       |
| 35 | GAG AGA CAT ATG GCC CAG ACT TCA TTG AC          | For Primer for GSU2016 into pCOLA       |
| 36 | GAG AGA AGA TCT TTA CGG GGC TGA GTT CAG ACT G   | Rev Primer for GSU2016 into pCOLA       |
| 37 | GAG AGA CAT ATG GCG AAT CTC AAG CGA TAT AAT     | For Primer for GSU2044 into pCOLA       |
| 38 | GAG AGA CTC GAG TCA GCA CCA GGT TCC GAA AC      | Rev Primer for GSU2044 into pCOLA       |
| 39 | GAG AGA CAT ATGAGATCTGACCTGAGAATAGCC            | For Primer for GSU2062 into pCOLA       |
| 40 | GAG AGA CTC GAG TCAGTACTTACGTCGGTTCGAC          | Rev Primer for GSU2062 into pCOLA       |
| 41 | GAG AGA CAT ATG CGA ATT CTC ATC GCC             | For Primer for GSU2313 into pCOLA       |
| 42 | GAG AGA CTC GAG TCA TGG TGA TCC CGC CTG         | Rev Primer for GSU2313 into pCOLA       |
| 43 | GAG AGA CAT ATG GTT GCG TTC TTC ACA CAG TA      | For Primer for GSU2511 into pCOLA       |
| 44 | GAG AGA CTC GAG TCA TTC CCT CGG CGC             | Rev Primer for GSU2511 into pCOLA       |
| 45 | GAG AGA CAT ATG GCC GAA TCA CGT CC              | For Primer for GSU2534 into pCOLA       |
| 46 | GAG AGA CTC GAG CTA GCA CGG GGA TCC GG          | Rev Primer for GSU2534 into pCOLA       |
| 47 | GAG AGA CAT ATG AAC ACC CTG ACG GCA             | For Primer for GSU2632 into pCOLA       |
| 48 | GAG AGA CTC GAG TCA GGT GCT CAC CTG GTT GC      | Rev Primer for GSU2632 into pCOLA       |
| 49 | GAG AGA CAT ATG ACT GAA TTG ACG GAG TTC GTA G   | For Primer for GSU2828 into pCOLA       |
| 50 | GAG AGA CTC GAG TCA TCC GTT CAC TGC GCC         | Rev Primer for GSU2828 into pCOLA       |
| 51 | GAG AGA CAT ATG CCC AAC AAC GAC AGC             | For Primer for GSU2969 into pCOLA       |
| 52 | GAG AGA CTC GAG TCA GGG TGA CGC GGA C           | Rev Primer for GSU2969 into pCOLA       |
| 53 | GAG AGA CAT ATG ACG CGC CGG C                   | For Primer for GSU3350 into pCOLA       |
| 54 | GAG AGA CTC GAG TCA ATC GGT TCC GTC CG          | Rev Primer for GSU3350 into pCOLA       |
| 55 | GAG AGA CAT ATG AGA CGA GCA AGC CTG AAA         | For Primer for GSU3356 into pCOLA       |
| 56 | GAG AGA AGA TCT TCA GGA GGC CGA AAC GG          | Rev Primer for GSU3356 into pCOLA       |
| 57 | GAG AGA CAT ATG GCG ATG ACA GCC CTC             | For Primer for GSU3376 into pCOLA       |
| 58 | GAG AGA CTC GAG TTA TGT CGA GCC TGA CAT GAG CTC | Rev Primer for GSU3376 into pCOLA       |
| 59 | GAG AGA CTC GAG ACG GAT TGC CGT TGC             | Rev Primer for GSU1658 into pET24a      |
| 60 | CAACCGTGGCTGAAGCCATTCGTCGCTCCATC                | For Primer to Quickchange GSU1658 R393A |
| 61 | GATGGAGCGACGAATGGCTTCAGCCACGGTTG                | Rev Primer to Quickchange GSU1658 R393A |
| 62 | CCATCTTTTTGGGGCCAGGTCCTCCATG                    | For Primer to Quickchange GSU1658 S347A |
| 63 | CATGGAGGACCTGGGCCCAAAAAGATGG                    | Rev Primer to Quickchange GSU1658 S347A |
| 64 | CGGCCATCTTTTTGGGGATCAGGTCCTCCATGAAG             | For Primer to Quickchange GSU1658 S347D |
| 65 | CTTCATGGAGGACCTGATCCCCAAAAGATGGCCG              | Rev Primer to Quickchange GSU1658 S347D |
| 66 | GGCCATCTTTTTGGGAATCAGGTCCTCCATGAAG              | For Primer to Quickchange GSU1658 S347N |

|     |                                          |                                                                                    |
|-----|------------------------------------------|------------------------------------------------------------------------------------|
| 67  | CTTCATGGAGGACCTGATTCCCAAAAAGATGGCC       | Rev Primer to Quickchange GSU1658 S347N                                            |
| 68  | GTAATCATTGCTACCTTGCGACGAGTTCACC          | For Primer to Quickchange GSU1658 G371L                                            |
| 69  | GGTGAACCTCGTCGCCAAGGTAGCGAATGATTAC       | Rev Primer to Quickchange GSU1658 G371L                                            |
| 70  | CCACCTCGTCATTACCGCACTGGTCATGCCCGGAATG    | For Primer to Quickchange GSU1658 D52A                                             |
| 71  | CATTCCGGGCATGACCAGTGCGGTAATGACGAGGTGG    | Rev Primer to Quickchange GSU1658 D52A                                             |
| 72  | CGTCATTACCGAGCTGGTCATGCCC                | For Primer to Quickchange GSU1658 D52E                                             |
| 73  | GGGCATGACCAGCTCGGTAATGACG                | Rev Primer to Quickchange GSU1658 D52E                                             |
| 74  | GAGAGAGGATCCATGGACGCCACACTATC            | For Primer for ACP_2467 into pET-MBP                                               |
| 75  | GAGAGACTCGAGTCATGAGTTGCGGAGCAGTTC        | Rev Primer for ACP_2467 into pET-MBP                                               |
| 76  | AGAGACAT ATGTGCGCGGCCG                   | For Primer for Bd0367 into pET24a                                                  |
| 77  | AGAGACTCGAGACCGGCGGCTTTACG               | Rev Primer for Bd0367 into pET24a                                                  |
| 78  | AGAGACATATGAACCTTAACTGGGCGC              | For Primer for Cabther_A1065 into pET24a                                           |
| 79  | AGAGACTCGAGAGGTTTGACAGGCTGCG             | Rev Primer for Cabther_A1065 into pET24a                                           |
| 80  | GAGAGAGGATCCATGATTGATAACAAGATTAACAC      | For Primer for Calni_1629 into pET-MBP                                             |
| 81  | AGAGAGCTCGAGTCAGTCTTTCAGCAGGAACTC        | Rev Primer for Calni_1629 into pET-MBP                                             |
| 82  | GAGAGAGGATCCATGTATGAAAGCCTGAAACG         | For Primer for DEFDS_0689 into pET-MBP                                             |
| 83  | AGAGAGCTCGAGTCATAAGGAAGAATTTTTGGTCAGG    | Rev Primer for DEFDS_0689 into pET-MBP                                             |
| 84  | GAGAGACATATGCTGAACAAGTCAAGCATC           | For Primer for Ddes_1475 into pET24a                                               |
| 85  | GAGAGACTCGAGAGAGTCGTCGTGCGTGG            | Rev Primer for Ddes_1475 into pET24a                                               |
| 86  | AGAGACATATGAATCCCGCGGACCTC               | For Primer for Mxan_2643 into pET24a                                               |
| 87  | AGAGAGCGGCCGCTCCGGGAACCTCGTGG            | Rev Primer for Mxan_2643 into pET24a                                               |
| 88  | AGAGACATATGGCGCGAATCCTCC                 | For Primer for Mxan_4463 into pET24a                                               |
| 89  | AGAGACTCGAGGGACGCGGAGTGGGC               | Rev Primer for Mxan_4463 into pET24a                                               |
| 90  | GAGAGACATATGAGCGCCCGATCCTCG              | For Primer for ccPleD into pET24a                                                  |
| 91  | GAGAGACTCGAGTCAGGCGGCCTTGCCG             | Rev Primer for ccPleD into pET24a                                                  |
| 92  | CTGGTCGGTGACGGC                          | LIC primers for GSU1658-PleD fusion (rev; primes to PleD 293)                      |
| 93  | GCCGTCACCGACCAGCTCACGGGACTCTTCAACTAC     | Lic primers for GSU1658-PleD fusion (overhang with PleD NTD; primes to 1658 f 297) |
| 94  | CTTCGGTCACGATATCGGCAGTGAGGTGCTGCGCGAGTTC | For primer to Quickchange PleD D344S                                               |
| 95  | GAACTCGCGCAGCACCTACTGCCGATATCGTGACCGAAG  | Rev primer to Quickchange PleD D344S                                               |
| 96  | GGGCACCAGATGGGAAGCGACCTCCTCAAATG         | Forward primer for Round-the-horn of GSU1400 D195S                                 |
| 97  | GAAACTGTCGTTGATCTCCTTGAAG                | Reverse primer for Round-the-horn of GSU1400 D195S                                 |
| 98  | CATCAGACCGGAAGCGAGGTGCTGTGC              | Forward primer for Round-the-horn of GSU2313 D194S                                 |
| 99  | ACCGTAACGGTCGTTTACCC                     | Reverse primer for Round-the-horn of GSU2313 D194S                                 |
| 100 | CCACGACGCCGGCAGTGTGCTCCTGATGG            | Forward primer for Round-the-horn of GSU2534 D325S                                 |
| 101 | CCGAAGACATCGTTCCTCC                      | Reverse primer for Round-the-horn of GSU2534 D325S                                 |
| 102 | CACCTCCGGGGCAGCGAGGTCCTCAG               | Forward primer for Round-the-horn of GSU3350 D471S                                 |
| 103 | GCCGTGGCAGTCGTTG                         | Reverse primer for Round-the-horn of GSU3350 D471S                                 |
| 104 | GAGAGGATCCATGAATCCCGCGGACCTC             | For primer for Mxan_2643 into pET-MBP                                              |
| 105 | GAGAGAGTGCAGTCATCCGGAACTCGTGG            | Rev primer for Mxan_2643 into pET-MBP                                              |
| 106 | GAGAGGATCCATGTCGCGCGCCG                  | For primer for Bd0367 into pET-MBP                                                 |

|     |                                |                                           |
|-----|--------------------------------|-------------------------------------------|
| 107 | GAGAGACTCGAGTCAACCGGCGGCTTTACG | Rev primer for Bd0367 into pET-MBP        |
| 108 | GCAGGGCGGGGCTTCCTC             | For primer to Quickchange Mxan_2643 R292A |
| 109 | AAAGGCCTCGCAGACG               | Rev primer to Quickchange Mxan_2643 R292A |
| 110 | GCGCTGCGCGAAAATATTGAAAAAAC     | For primer to Quickchange Bd0367 R260A    |
| 111 | CTCGCAAAAATACATAGCG            | Rev Primer to Quickchange Bd0367 R260A    |

## References

1. Paige JS, Wu KY, Jaffrey SR (2011) RNA Mimics of Green Fluorescent Protein. *Science* 333:642–646.
2. Kranzusch PJ, Lee AS-Y, Berger JM, Doudna JA (2013) Structure of Human cGAS Reveals a Conserved Family of Second-Messenger Enzymes in Innate Immunity. *Cell Rep* 3:1362–1368.
3. Spangler C, Böhm A, Jenal U, Seifert R, Kaefer V (2010) A liquid chromatography-coupled tandem mass spectrometry method for quantitation of cyclic di-guanosine monophosphate. *J Microbiol Methods* 81(3):226–231.
4. Kellenberger CA, et al. (2015) GEMM-I riboswitches from *Geobacter* sense the bacterial second messenger cyclic AMP-GMP. *Proc Natl Acad Sci U S A* 112(17):5383–5388.
5. Velazquez-Campoy A, Leavitt SA, Freire E (2004) Characterization of Protein-Protein Interactions by Isothermal Titration Calorimetry. *Methods in Molecular Biology*, pp 35–54.
6. Wassmann P, et al. (2007) Structure of BeF<sub>3</sub>--Modified Response Regulator PleD: Implications for Diguanylate Cyclase Activation, Catalysis, and Feedback Inhibition. *Structure* 15(8):915–927.
7. Campos JM, Geisselsoder J, Zusman DR (1978) Isolation of bacteriophage MX4, a generalized transducing phage for *Myxococcus xanthus*. *J Mol Biol* 119(2):167–178.
8. Waterhouse AM, Procter JB, Martin DM a, Clamp M, Barton GJ (2009) Jalview Version 2-A multiple sequence alignment editor and analysis workbench. *Bioinformatics* 25(9):1189–1191.
9. Gao X, et al. (2013) Functional characterization of core components of the *Bacillus subtilis* c-di-GMP signaling pathway. *J Bacteriol* 195(21):4782–4792.
